# 1 **Genome-wide survey of the F-box/Kelch (FBK) members** 2 **and molecular identification of a novel FBK gene *TaAFR*** 3 **in wheat**

4 Chunru Wei<sup>1</sup>, Weiquan Zhao<sup>2</sup>, Runqiao Fan<sup>1</sup>, Yuyu Meng<sup>1</sup>, Yiming Yang<sup>1</sup>, Xiaodong Wang<sup>2</sup>, Nora A.

5 Foroud<sup>3</sup>, Daqun Liu<sup>2</sup>, Xiumei Yu<sup>1,2,\*</sup>

6 <sup>1</sup> College of Life Sciences/Key Laboratory of Hebei Province for Plant Physiology and Molecular  
7 Pathology, Hebei Agricultural University, Baoding, Hebei, China

8 <sup>2</sup> Technological Innovation Centre for Biological Control of Crop Diseases and Insect Pests of Hebei  
9 Province, Hebei Agricultural University, Baoding, Hebei, China

10 <sup>3</sup> Lethbridge Research and Development Centre, Agriculture and Agri-Food Canada, Lethbridge,  
11 Alberta, Canada

12 \*Corresponding author

13 E-mail: yuxiumei@hebau.edu.cn (XY)

## 14 **Abstract**

15 F-box proteins play critical roles in plant responses to biotic/abiotic stresses. In the present study, a  
16 total of 68 wheat F-box/Kelch (*TaFBK*) gene sequences encoding for 74 proteins were obtained in a  
17 genome-wide survey against EnsemblPlants. The 74 *TaFBK* proteins were divided into 5 categories  
18 based on their domain structures. The FBK proteins from wheat, Arabidopsis, and three other cereal  
19 species were grouped into 7 clades, and the number of Kelch domains present was their key clustering  
20 criterion. Sixty-eight *TaFBK* genes were unevenly distributed on 21 chromosomes. Most of *TaFBKs*  
21 were predicted to localize in the nucleus and cytoplasm. *In silico* analysis of a digital PCR revealed  
22 that *TaFBKs* were expressed at multiple developmental stages and tissues, and in response to drought

23 and/or heat stresses. The *TaFBK19* gene, a homologous to the *Attenuated Far-Red Response (AFR)*  
24 genes in other plant species, and hence named *TaAFR*, was selected for further analysis. The gene was  
25 isolated from the wheat line TcLr15 and its expression evaluated by quantitative real-time PCR.  
26 *TaAFR* transcripts were primarily detected in wheat leaves, and its expression was found to be  
27 regulated by various abiotic and biotic stresses as well as plant signaling hormones. Of particular  
28 interest, *TaAFR* expression was differentially regulated in the compatible vs incompatible wheat leaf  
29 rust reaction. Subcellular localization studies showed that TaAFR accumulates in the nucleus and  
30 cytoplasm. Three TaAFR-interacting proteins were identified experimentally: Skp1/ASK1-like protein  
31 (Skp1), ADP-ribosylation factor 2-like isoform X1 (ARL2) and phenylalanine ammonia-lyase (PAL).  
32 Further analysis revealed that the Skp1 protein interacted specifically with the F-box domain of  
33 TaAFR, while ARL2 and PAL were recognized by the Kelch domain. The data presented herein  
34 provides a solid foundation from which the function and metabolic network of TaAFR and other  
35 wheat FBKs can be further explored.

36 **Key words:** Wheat F-box/Kelch; Genome-wide survey; AFR; Expression pattern; Protein interaction

## 37 **Introduction**

38 In eukaryotes, the ubiquitin/26S proteasome system (UPS) is responsible for the selective degradation  
39 of most intracellular proteins [1]. Together with Suppressor of Kinetochores Protein 1 (SKP1), Cullin 1  
40 (CUL1) and Ring-Box 1 (RBX1), F-box proteins form a ubiquitin ligase complex, where it plays the  
41 critical role of recruiting substrates to the UPS [2]. F-box proteins carry one or more 40-50 residue  
42 F-box/F-box-like domains in their N-terminus that are in charge of binding to Skp1/Skp1-like proteins  
43 [3]. Meanwhile, one or more additional conserved domains involved in substrate specificity can be  
44 found downstream of the F-box/F-box-like domain(s), such as Kelch repeats, Leucine Rich Repeat

45 (LRR) and WD40-repeats [4]. The F-box members form a large family of proteins in plants. Within  
46 the F-box family, the Kelch subfamily is one of the large groups and F-box/Kelch (FBK) proteins are  
47 almost exclusively found in plants. The Kelch domain, originally identified in *Drosophila* mutants  
48 consists of 44-56 residues [5], and one or more Kelch domains can be found in an FBK protein.

49 The size of the FBK subfamily varies depending on the plant species. In 2009, Xu et al. reported the  
50 identification of 96 FBKs in Arabidopsis, along with 27 and 35 FBKs from rice and poplar,  
51 respectively [6]. Using this information, Schumann et al. went on to identify additional FBKs in  
52 numerous species, and found 103, 68 and 36 FBKs from the dicot species, *Arabidopsis thaliana*,  
53 *Populus trichocarpa* and *Vitis vinifera*, respectively, 44 and 39 FBKs in the monocot species,  
54 *Sorghum bicolor* and *Oryza sativa*, respectively, and 71 and 46 FBKs in the non-seed embryophytes  
55 *Physcomitrella patens* and *Selaginella moellendorffii*, respectively [7]. The former study reported that  
56 the FBK subfamily altered their protein structures by increasing or decreasing the number of exons,  
57 and the subfamily size was expanded primarily *via* tandem duplications [6]. The FBKs have been  
58 found to participate in biological clock regulation, photomorphogenesis, phenylpropanoid and  
59 pigmentation biosynthesis and biotic stress responses [6, 8-12]. While the FBKs subfamily exists in  
60 plants in relatively high numbers, and participates in many important biological processes, no  
61 systematic studies of the FBK subfamily have previously been reported in hexaploid wheat species.

62 To initiate FBK research in hexaploid wheat and to further our understanding of their role in various  
63 biological processes, a genome-wide identification study of this subfamily of F-box proteins and a  
64 systemic analysis of protein structure, phylogenetic relationship, chromosome distribution, and  
65 expression patterns in response to different stresses are presented herein. Sixty-eight genes encoding  
66 74 wheat FBK (TaFBK) proteins were identified, and an analysis of protein structure, phylogenetic

67 relationship, chromosome distribution, and expression patterns in response to different stimuli and  
68 stresses is presented. *In silico* expression analysis revealed that these genes were differentially  
69 regulated in response to drought and heat stress. One gene, *TaFBK19*, which showed similarities to the  
70 *Attenuated Far-Red Response (AFR)* gene, was selected for further investigations, and is described  
71 here as *TaAFR*.

72 AFR F-box genes are involved in light signaling but have also been shown to participate in plant  
73 stress responses. Through the course of its cultivation, wheat is subjected to many kinds of  
74 environmental and biotic stresses including salt, drought, cold, heavy metals and various pathogens.  
75 These stresses can affect crop productivity and yield, which can be mitigated if a timely and  
76 appropriate stress response is mounted in the plant. To determine whether *TaAFR* is involved in the  
77 plant's response to different stress stimuli, the wheat line TcLr15 was exposed to leaf rust pathogen,  
78 salt, drought and H<sub>2</sub>O<sub>2</sub>, salicylic acid (SA), abscisic acid (ABA) and methyl-jasmonate (MeJA), and  
79 changes in gene expression were assessed by quantitative real-time PCR (qRT-PCR). Subcellular  
80 localization of *TaAFR* was experimentally determined, and its interactions with other proteins was  
81 investigated using a combination of yeast-2-hybrid (Y2H), bimolecular fluorescence complementation  
82 (BiFC) and co-immunoprecipitation (Co-IP) assays. While providing a glimpse into the function of  
83 *TaAFR* and other FBKs in wheat, the results presented herein build the foundation to further dissect  
84 the function and metabolic network of this important gene family.

## 85 **Materials and Methods**

### 86 **Genome-wide survey of wheat FBKs**

#### 87 **Database search, sequence analysis and classification of wheat FBKs**

88 The Hidden Markov Model (HMM) profiles of the F-box domain (PF00646, PF15966), F-box-like  
89 domain (PF12937, PF13013) and Kelch domain (PF01344, PF07646, PF13415, PF13418, PF13854,  
90 PF13964) were obtained from Pfam (<http://pfam.xfam.org/>). To identify wheat FBKs, the  
91 HMMER3.1b2 software was first used to search for F-box and F-box-like domains encoded in wheat  
92 genes deposited in the IWGSC (Wheat Genome Sequencing Consortium) RefSeq v1.0 wheat database  
93 downloaded from EnsemblPlants (<https://plants.ensembl.org/index.html>) (E value cut-off of 1.0) [13],  
94 and TBtools (v0.6673) was used to extract the target sequences. Sequences encoding F-box and  
95 F-box-like domains were further screened for the presence of one or more Kelch domains (E value  
96 cut-off of 1.0). Finally, Pfam, SMART (<http://smart.-heidelberg.de/>) and HMMER (web version  
97 2.25.0, <https://www.ebi.ac.uk/Tools/hmmer/>) were adopted to confirm the presence of both the F-box  
98 (or F-box-like) and Kelch domains in each FBK protein identified, E value <1.0.; sequences that did  
99 not meet this criterion were removed.

100 The predicted isoelectric point (*pI*) and molecular weight (MW) of the putative wheat FBKs  
101 (TaFBKs) were computed at ExPASy ([https://web.expasy.org/compute\\_pi/](https://web.expasy.org/compute_pi/)). The intron-exon  
102 organization of wheat FBKs was obtained from EnsemblPlants. Subcellular localizations were  
103 predicted using cropPAL2020 dataset (<https://crop-pal.org/>).

## 104 **Analysis of conserved residues within the F-box and Kelch domains of** 105 **wheat FBK proteins**

106 The ClustalX2.0 multiple sequence alignment tool was used to align the F-box or Kelch domains  
107 extracted from the TaFBK protein sequences, and WebLogos (<http://weblogo.berkeley.edu/>) were  
108 generated for each of the two domains.

## 109 **Phylogenetic analysis**

110 In order to study the phylogenetic relationship and evolution of wheat FBKs, the obtained TaFBK  
111 sequences were compared with the orthologues of model dicot species Arabidopsis (AtFBK), and  
112 three important monocots rice (OsFBK), sorghum (SbFBK) and maize (ZmFBK). The AtFBK,  
113 OsFBK, SbFBK sequences reported by Schumann et al. and ZmFBKs reported by Jia et al. were  
114 downloaded and screened for the presence of the F-box and Kelch domains [7, 14]. Sequences that did  
115 not carry both F-box and Kelch domain(s) were removed, 94, 31, 34 and 32 FBK protein sequences  
116 were left for Arabidopsis, rice, sorghum and maize, respectively. These FBKs from wheat,  
117 Arabidopsis, rice, sorghum and maize were subsequently aligned with the ClustalX 2.0 algorithm and  
118 a phylogenetic tree was constructed by the Maximum Likelihood (ML) in MEGA7 using default  
119 parameters, with bootstrap value set to 1000 repetitions.

## 120 **Chromosomal distribution and gene duplication analysis**

121 The chromosomal distribution of wheat *FBK* genes were obtained from the EnsemblPlants (IWGSC  
122 RefSeq v1.0). MapDraw was used to visualize the detailed location of each *TaFBK* gene on the wheat  
123 chromosome [15]. Greater than 70% sequence similarity was set as the criterion for determining gene  
124 duplication [16]. When the maximum distance between duplicated genes on the same chromosome  
125 was smaller than 50 kb, tandem duplication and duplicated genes on different chromosomes were  
126 delimited as segmental duplication [17].

## 127 ***In silico* expression analysis of *TaFBK* genes**

128 *FBK* gene sequences obtained from the EnsemblPlants were input into the WheatExp wheat database  
129 (<https://wheat.pw.usda.gov/WheatExp/>) and searched for the corresponding gene ID. According to

130 transcriptomics data from digital PCR experiments deposited in WheatExp, FPKM (Fragments per  
131 kilobase per million mapped reads) values of *FBKs* were obtained from 5 tissues (CS) at different  
132 development stages: leaves (z10, z23, z71), roots (z10, z13, z39), stems (z30, z32, z65), spikes (z32,  
133 z39, z65) and grains (z71, z75, z85) [18]. In order to determine the relationship between *FBKs*  
134 expression and the abiotic stress response in wheat, the FPKM values were downloaded from  
135 hexaploid bread wheat (cultivar TAM 107) treated with drought (DS), heat (HS) and drought+heat  
136 (HD) stresses [19]. TBtools (v0.6673) was used to draw a heat map according to their corresponding  
137 FPKM values.

## 138 **Molecular identification and expression patterns of *TaAFR***

139 The wheat FBK gene, *TaFBK19*, was selected for further analysis. This gene is similar to the Kelch  
140 containing F-box *AFR* genes from other species and is therefore described here as *TaAFR*.

## 141 **Plant material, fungal strains and inoculum preparation**

142 A near-isogenic wheat line of Thatcher for leaf rust resistance, TcLr15, and leaf rust strains  
143 05-5-137<sup>③</sup> and 05-19-43<sup>②</sup> were used in the present study. Unless otherwise specified, plants were  
144 grown in a greenhouse as described in Yu et al. [20]. Urediniospore and inoculum preparation of leaf  
145 rust pathogens were carried out as previously described [20].

## 146 ***TaAFR* cloning**

147 Total RNA extraction and first strand cDNA synthesis were performed as previously described [20]. A  
148 pair of gene specific primers *TaAFR*-F and *TaAFR*-R (S1 Table) and Tks Gflex™ DNA Polymerase  
149 (TaKaRa, Japan) were used to amplify the full-length coding sequences CDS amplified with Tks  
150 Gflex™ DNA Polymerase (TaKaRa, Japan) according to manufacturer's directions with an annealing  
151 temperature of 56.4°C. The purity of the amplicon was verified by 1.2 % agarose gel electrophoresis

152 and the product was sequenced to confirm the identity of the clone.

153 The *TaAFR* sequence was used to pull out related sequences from the NCBI transcript database  
154 using the BLASTp tool, and sequences with an expect threshold of <0.05 were aligned together with  
155 *TaAFR* in MEGA 7.0 and a phylogenetic tree was constructed, as described in the section on  
156 phylogenetic analysis. The *TaAFR* protein sequence was also analyzed using various bioinformatics  
157 tools to predict presence of signal peptides (SignalP-4.1, [www.cbs.dtu.dk/services/SignalP/](http://www.cbs.dtu.dk/services/SignalP/)),  
158 transmembrane domains (TMHMM Server v. 2.0, [www.cbs.dtu.dk/services/TMHMM/](http://www.cbs.dtu.dk/services/TMHMM/)), and  
159 subcellular localization (cropPAL2020 dataset). The 3D structure was predicted in Phyre2  
160 ([www.sbg.bio.ic.ac.uk/phyre2/](http://www.sbg.bio.ic.ac.uk/phyre2/)).

## 161 **Wheat treatments and sampling for quantitative real-time PCR**

162 Sampling of wheat for gene expression analysis was carried out in different tissues (for tissue-specific  
163 analysis) and in response to three different types of abiotic stresses and three hormone treatments, as  
164 described below. For each experiment, samples were collected from three replicates, unless otherwise  
165 specified, 3-5 samples were harvested for each replicate. Samples were flash frozen in liquid nitrogen  
166 and stored at  $-80^{\circ}\text{C}$  prior to RNA extraction.

167 To detect tissue-specific expression levels of the *TaAFR* gene, samples were collected from TcLr15  
168 7-day old seedlings and adult plants grown in a pot with nutrient soil (Hebei Fengyuan, China) in a  
169 greenhouse ( $22^{\circ}\text{C}$ , 16 h light/8 h dark). Roots, stems and leaves were collected at z11; pistils, stamens  
170 and flag leaves were collected at z51. A large number of pistils and stamens (50-100 mg) were  
171 sampled from wheat florets.



172 To assess the effect of leaf rust pathogen on *TaAFR* expression, TcLr15 plants were inoculated with  
173 05-5-137<sup>③</sup>, 05-19-43<sup>②</sup>, or water (negative control), as previously described [20]. The inoculated  
174 leaves were harvested at 0, 6, 12, 24, 48 and 96 hours post inoculation (hpi).

175 The effect of abiotic stress treatments on *TaAFR* expression was evaluated in TcLr15 plants grown in  
176 Hoagland's solution [21]. Once plants reached the three-leaf stage (z13), the Hoagland's solution was  
177 amended with NaCl, PEG 6000 and H<sub>2</sub>O<sub>2</sub>, to a final concentration of 300 mM, 10 % and 7 mM,  
178 respectively [22-24]. The second leaves were sampled at 0, 0.5, 2, 6, 12, 24 and 48 h post-treatment.  
179 Samples were also collected at the same time points from untreated negative control plants in  
180 Hoagland's solution.

181 The plant hormones, SA, ABA and MeJA, are known to be involved in both abiotic and biotic  
182 stress responses [25, 26]. To investigate the effects of 3 hormones on the expression of *TaAFR*,  
183 exogenous treatments of SA (2 mM), ABA (100 μM) and MeJA (100 μM), each dissolved in 0.1%  
184 absolute ethanol [22, 26], were applied to TcLr15 seedlings (z11) grown in pot with nutrient soil in  
185 greenhouse. The negative control plants were sprayed with 0.1% absolute ethanol. The primary leaf of  
186 each plant was sampled at 0, 0.5, 2, 6, 12, 24 and 48 h post-treatment.

## 187 **Quantitative real-time PCR (qRT-PCR)**

188 Total RNA was extracted from the TcLr15 samples collected in the previous section for gene  
189 expression analysis, using Biozol reagent (BioFlux, Japan) according to manufacturer's instructions.  
190 To eliminate gDNA contamination, 2 ug of each RNA sample was treated with 1 uL gDNA Remover  
191 (TransGen, China). cDNA synthesis was carried out as described by Yu et al. [20]. qRT-PCR was  
192 performed on a Bio-Rad CFX Manager qRT-PCR instrument (Bio-Rad, America). cDNA was diluted  
193 2-fold (800 ng/uL), and 1 uL was used as template in 20 uL qRT-PCR reaction, with TransStart Top

194 Green qRT-PCR Super Mix (TransGen, China) and gene specific primers qRT-PCR-*TaAFR*-F and  
195 qRT-PCR-*TaAFR*-R (S1 Table), and the reaction carried out with an annealing temperature of 58.3°C.  
196 A similar reaction was carried out using primers for the wheat reference gene *GAPDH* (GenBank:  
197 AF251217) (primers qRT-PCR-*GAPDH*-F and qRT-PCR-*GAPDH*-R, annealing temperature of  
198 58.3°C) (S1 Table). Three technical replicates were conducted for each of three biological replicates  
199 per sample. The relative expression of *TaAFR* was evaluated as described by Yu et al. [20]. For  
200 samples where a treatment was included, the value of the control treatments were subtracted from  
201 those of the treated samples prior to comparing expression with the time zero untreated controls.

## 202 **Subcellular localization**

203 *TaAFR* CDS, minus the stop codon, was inserted upstream of a GFP tag in the pSuper1300 vector  
204 (Laboratory preservation), and the recombinant construct was transformed into *Agrobacterium*  
205 GV3101. The strain GV3101-pSuper1300-*TaAFR* was injected into *N. benthamiana* leaves at the  
206 five-leaf stage, and then observed over a period of 30 to 80 h by fluorescence microscope (Nikon Ti 2,  
207 Japan) with an excitation wavelength of 495 nm.

## 208 **Identification of TaAFR interacting proteins**

### 209 **Yeast-2-hybrid (Y2H)**

210 The *TaAFR* CDS was cloned into the yeast bait vector pGBKT7 which carries the GAL4  
211 DNA-binding domain (BD), and the construct, BD-*TaAFR*, was subsequently transformed into yeast  
212 strain Y187. A yeast cDNA library (AD-*cDNA*) previously constructed was used to screen the partner  
213 proteins of *TaAFR* [27]. Y187-BD-*TaAFR* was co-cultured overnight in YPDA media with  
214 AH109-AD-*cDNA* at 30°C with gentle agitation (50 r/min). The mated culture was spread onto petri

215 plates with SD-WLHA medium and incubated at 30°C for 3-5 days. Positive clones were sequenced  
216 by Beijing Zhongke Xilin Biotechnology Co., Ltd., and the identity of the partner proteins were  
217 determined by BLAST alignments.

218 Once the identities of the positive interaction were determined, the CDS sequences were amplified  
219 from cDNA of TcLr15 inoculated with leaf rust strain 05-19-43<sup>②</sup>. These coding sequences were then  
220 inserted into the pGADT7 vector to generate recombinant *AD-Prey* for re-testing the interactions with  
221 the bait protein in the *BD-TaAFR* construct. Positive clones were tested by Y2H further detected by  
222  $\beta$ -galactosidase.

223 To determine which of the TaAFR domain(s) were interacting with the partner proteins, the cDNA  
224 sequences of each of the F-box (1-71 aa) and Kelch (72-383 aa) domains of *TaAFR* were inserted into  
225 BD vectors. *AD-Prey* that showed positive interactions with *BD-TaAFR* were then screened for  
226 interactions with each of these two domains: *AD-Prey* with *BD-TaAFR-F-box* or with  
227 *BD-TaAFR-Kelch* were verified by Y2H assay as described above.

## 228 **Bimolecular fluorescence complementation (BiFC)**

229 Y2H positive interactions were validated by BiFC. The CDS of *TaAFR* and the partner proteins were  
230 inserted into pSPY CE and pSPY NE vectors (Laboratory preservation) to construct the pSPY  
231 CE-*TaAFR* and pSPY NE-*Prey* vectors, respectively. GV3101 with pSPY CE-*TaAFR* and with pSPY  
232 NE-*Prey* were combined and co-injected into the *Nicotiana benthamiana* leaves. Fluorescence signal  
233 was observed as described in the subcellular localization section.

## 234 **Co-immunoprecipitation (Co-IP)**

235 The positive interactions tested by BiFC were further validated by Co-IP. The CDS of *TaAFR* and the

236 putative partner proteins were inserted into pTF101 (Laboratory preservation) with HA or FLAG tags  
237 to construct the recombinant vectors pTF101 HA-*TaAFR* and pTF101 FLAG-*Prey*, respectively.  
238 GV3101 containing with pTF101 HA-*TaAFR* and pTF101 FLAG-*Prey* were co-injecting and  
239 transiently expressed in *N. benthamiana*. The combination of pTF101 HA-*TaAFR* and pTF101  
240 FLAG-*TaGFP* were used as the negative control. Proteins were extracted from leaves of *N.*  
241 *benthamiana* sampled after co-injecting 60 h and subjected to IP by HA-magnetic beads. The eluted  
242 proteins were subjected to immunoblot analysis with anti-FLAG tag polyclonal antibody (Solarbio,  
243 China). The detailed Co-IP was performed as described by Zhu and Huq [28].

## 244 **Results**

### 245 **Genome-wide identification of wheat FBKs**

#### 246 **74 Wheat FBK proteins were identified and divided into 5 categories based** 247 **on their functional domains**

248 The seed sequences of F-box (457), F-box-like (306) and Kelch (486) domains were obtained from the  
249 Pfam database. “F-box domain” will be used henceforth to describe both F-box and F-box-like  
250 domains. A total of 192 transcript sequences containing at least one F-box and/or Kelch domain were  
251 identified by searching wheat IWGSC translated transcript database with HMMER3.1b2. Among  
252 these, 68 genes encoding 74 transcripts were found to carry both the F-box and Kelch domains  
253 predicted by SMART and HMMER. The putative protein sequences (S1 File), their theoretical  
254 isoelectric point (*pI*), molecular weight (MW), number of intron, subcellular localization and  
255 functional domains of the 74 putative wheat FBKs are presented in S2 Table. Wheat FBK (TaFBK)  
256 proteins ranged from 239 to 643 residues in length, with predicted MWs of 27.41-69.41 kDa and

257 theoretical  $pI$ s of 4.18-9.99, of which the number of acidic/alkaline proteins account for half of the  
258 proteins, and 22 of these (29.7%) were greater than 9.0. Most of the TaFBKs were predicted to  
259 localize in the nucleus, cytoplasm or plastid, while a handful were predicted to localize in various  
260 organelles (peroxisome, golgi). The intron-exon structure has been reported to be closely related to the  
261 evolution of the F-box superfamily [29]. The number of introns in 74 *TaFBK* transcripts varied from 0  
262 to 4, among them, 37 *TaFBK* transcripts had 1 intron (50.0%) and 25 transcripts had no intron  
263 (33.8%).

264 Each of the 74 *TaFBK* transcripts contained only one F-box domain at the N-terminus, with up to  
265 four Kelch domains at the C-terminus. A few members also carried PAS and PAC domains upstream  
266 of the F-box domain. According to their different domain structures, TaFBKs were divided into 5  
267 categories as followed: F-box+1 Kelch, F-box+2 Kelch, F-box+3 Kelch, PAS+F-box+4 Kelch, and  
268 PAS+PAC+F-box+4 Kelch (S1 Fig). The F-box+2 Kelch was the largest category, accounting for  
269 40.5%, followed by F-box+1 Kelch (35.1%), while PAS+PAC+F-box+4 Kelch was the least  
270 represented with 2 proteins in this group.

## 271 **Wheat FBKs show conservation of F-box and divergence of Kelch domain** 272 **sequences**

273 MEGA7 was used to align the F-box or Kelch domains of TaFBKs. WebLogo's were generated,  
274 where the height of each stacked letter represents the probability that a given amino acid will be  
275 occurred at each position (S2 Fig). In the wheat F-box domain (S2A Fig), L-16 and R-18 are relatively  
276 tall, indicated a high probability that those residues would be found at those positions. In the F-box  
277 domain alignment, 69 and 65 of the 74 proteins analyzed respectively carried L residues at the 16th  
278 position and R residues at the 18th position, which indicates that these 2 amino acids were indeed

279 highly conserved in F-box domain. In addition, L-6 (82.4%), P-7 (81.1%), V-30 (87.8%) and W-34  
280 (81.1%) were fairly conservative, followed by P-20 (73.0%), D-8 (68.9%), R-28(63.5%), R-32  
281 (60.8%), D-9 (56.8%), C-31 (59.5%), V-19 (54.1%), C-15 (52.7%) and A-11 (51.4%).

282 The Weblogo of the Kelch domain (S2B Fig) showed that G-19 (85.8%), G-20 (86.4%), W-53  
283 (97.9%) and M-59 (54.1%) were highly conserved. In addition, although the height of some residues,  
284 such as R-2 (14.11%), H-5 (11.5%), L-10 (15.5%), G-12 (25.0%) and D-45 (20.3%), were shown as  
285 relatively high in the Kelch domain, these were poorly conserved according to the statistical  
286 assessment. Compared to the other protein sequences, TaFBK65 had 3 additional residues (PVP) at the  
287 N-terminus of the F-box motif; these 3 residues were removed in order to prepare the Kelch WebLogo.  
288 In general, the amino acid sequences within the Kelch motif were more divergent than that observed  
289 within the F-box domain.

## 290 **Phylogenetic distribution of the wheat, Arabidopsis, rice, sorghum and** 291 **maize FBK subfamilies grouped according to the number of Kelch domains**

292 To understand the evolutionary relationship of the 74 TaFBKs members, a phylogenetic tree was  
293 constructed together with 94 Arabidopsis FBKs (AtFBKs), 31 rice FBKs (OsFBKs), 34 sorghum  
294 FBKs (SbFBKs) and 32 maize FBKs (ZmFBKs) (Fig 1). The tree resolved into 7 clades, where the  
295 AtFBKs were mainly distributed in clade G, all of TaFBKs, OsFBKs, SbFBKs and ZmFBKs, with the  
296 exception of three OsFBKs (22, 14 and 9) and three SbFBKs (23, 16 and 8), distributed in clades A to  
297 F. All members in clade C belong to the F-box+1 Kelch type, and among them, only 5 members were  
298 from Arabidopsis, while the remaining 37 were from Gramineae. In the clades D and F, the FBKs of  
299 F-box+2 Kelch type accounted for the largest size, containing only a few members of F-box+1 Kelch  
300 and F-box+3 Kelch types. Clade E mainly contains F-box+3 Kelch type FBKs from Gramineae and 3

301 members of F-box+2 Kelch that come from Arabidopsis. FBKs with 4 Kelch domains (F-box+4 Kelch,  
302 PAS+F-box+4 Kelch, PAC+F-box+4 Kelch, and PAS+PAC+F-box+4 Kelch) were from 5 species and  
303 absolutely grouped in clade B. AtFBK54 (LSM14+F-box+2 Kelch) grouped with other members of  
304 Arabidopsis F-box+2 Kelch in clade G, OsFBK31 and OsFBK28 (F-box+1 Kelch+RING) were  
305 divided into clade D. The phylogenetic analysis showed that the number of Kelch domains was a key  
306 classification criterion within the FBK subfamily.

307 **Fig 1. Phylogenetic analysis of FBK proteins in wheat, Arabidopsis and three important**  
308 **monocots.** The full-length amino acid sequences were aligned by ClustalX 2.0 and the Maximum  
309 Likelihood (ML) tree was constructed using MEGA7. FBK proteins were grouped into 7 distinct  
310 clades named A-G.

311 ***TaFBK* genes are unevenly distributed on the wheat chromosomes and**  
312 **mainly expanded its size by segmental duplications**

313 The chromosomal position of 68 *TaFBK* genes were retrieved from the EnsemblPlants and a  
314 chromosomal distribution map was generated (S3 Fig). The *TaFBK* genes were unevenly distributed  
315 on the wheat 21 chromosomes. The chromosomes of 4A (5), 4B (5), 6A (6), 6B (8), and 6D (6) had  
316 relatively higher distribution densities, whereas only one *TaFBK* gene was found on each of  
317 chromosomes 1B, 3B and 1D, and none were detected on chromosome 2B.

318 In animals, the number of F-box proteins is relatively low compared with plants, with only 68 and  
319 74 F-box genes in the human and mouse genomes, respectively [30]. Incidentally, the wheat genome  
320 encodes the same number of the Kelch subfamily proteins, which represents only a portion of F-box  
321 proteins encoded in this species. Gene duplication is thought to be the main driving factor in the

322 expansion of F-box family in plants [17]. To explore the evolutionary mechanism of wheat FBK  
323 subfamily, the present study investigated tandem duplication and segmental duplication events in the  
324 wheat FBK subfamily of the F-box family by observing similarities among 68 FBK sequences. A total  
325 of 57 *TaFBKs* were identified to be segmental or, to a lesser extent, tandem duplications. Among the  
326 segmental duplication genes, which were distributed to 20 wheat chromosomes, 8 groups consisted of  
327 a pair of genes, 6 groups contained 3 genes, and there were 2 groups each with 6 and 8 genes.  
328 Tandemly duplicated genes affected 8 *TaFBK* genes, and each of these occurred on the 4<sup>th</sup>  
329 chromosomes. These results indicate that both segmental and tandem duplications played a role in the  
330 expansion of the *TaFBK* subfamily, and unlike the results of Xu et al. in Arabidopsis and rice species,  
331 segmental duplications were more prolific in wheat [6].

### 332 **Tissue-specific and abiotic stress response *in silico* expression of *TaFBKs***

333 To glean insights into the putative functions of the identified wheat FBKs, *in silico* expression  
334 analysis of these genes was evaluated in different wheat tissues at different developmental stages, and  
335 in wheat leaves in response to environmental stresses. The FPKM values of *TaFBKs* from five  
336 different tissues and three stress combinations were downloaded from digital PCR data available in  
337 WheatExp (S3 Table) and were used to construct a heat map using the zero to one normalized scale  
338 method. Tissue-specific expression data (cultivar Chinese Spring) was available for 47 *TaFBKs* (Fig  
339 2). In general, *TaFBK* genes exhibited differential expression in all five wheat tissues, suggesting that  
340 these genes may be involved in the developmental regulation of multiple tissues. There were two  
341 conditions where tissue-specific expression at specific developmental stages showed significantly less  
342 transcript accumulation; these are leaf (z10) and grain (z75). Meanwhile, most *TaFBK* genes were  
343 generally more abundantly expressed in the spikes (z32, z39, z65) and grains (z71, z85). *TaFBK3*



344 transcripts specifically accumulated in root tissues, *TaFBK8* and *TaFBK29* expressed dominantly in  
345 mature leaf (z71), while *TaFBK60* and *TaFBK61* showed highest expression in root tissues followed  
346 by grain samples.

347 **Fig 2. Heat map showing digital expression profiles of *FBK* genes in various tissues and at**  
348 **different developmental stages of wheat based on FPKM values.** The color key represents FPKM  
349 values. Identity of tissue samples and developmental stages (Zadoks scale) are provided at the top of  
350 each lane.

351 A second data set from the WheatExp database was analyzed for the effect of drought (DS), heat  
352 (HS) and heat+drought (HD) stresses on the expression of the same 47 *TaFBK* genes in seedlings of  
353 the wheat cultivar TAM 107. A heat map was generated for this dataset showing differential  
354 expression at 1 h and 6 h (Fig 3). A general overview of expression of *TaFBK* genes affected by DS  
355 was as follows: 34.0% of the *TaFBK* genes were up-regulated; 47.0% genes showed strongly or  
356 slightly down-regulated expression; and 19.0% (9 transcript) maintained stable expression between  
357 treatment and control. Following heat treatment (HS) at 40°C, the following changes were observed:  
358 transcripts *TaFBK60*, *TaFBK61* and *TaFBK46* increased sharply at 1 h, and then decreased at 6 h;  
359 *TaFBK10*, *TaFBK23* and *TaFBK50* expression gradually increased from 0 h (control) to 6 h; eight  
360 *TaFBKs* were down-regulated at both time points assessed; transcripts of seven genes (14.9%)  
361 decreased to the roughly half of the control levels at 1 h; expression of the remaining 38.3% (18)  
362 genes sharply declined at 1 h after the stress treatment, and transcript accumulation of 7 of these 18  
363 genes returned to levels similar to that of the control by 6 h, while the remaining 9 genes increased  
364 slightly at 6 h compared with the earlier time point. Following the combined treatment HD: 25.5% of

365 the genes increased their expression from 1 h to 6 h compared with control; transcripts from seven  
366 genes gradually decreased from 1 to 6 h; 72.3% transcripts sharply decreased at 1 h treatment, then  
367 slightly or sharply increased at 6 h. In brief, HS caused more obvious and intense change on  
368 expression of *TaFBKs* when comparing to DS treatment.

369 **Fig 3. Heat map showing digital expression profiles of FBK genes in wheat response to DS, HS**  
370 **and HD based on FPKM values.** Color key represents FPKM values. The method and time of  
371 treatments are provided at the top of each lane. DS, drought stress; HS, heat stress; HD, heat+drought  
372 stresses.

## 373 **Molecular identification and expression patterns of *TaAFR***

### 374 ***TaAFR* gene encodes a wheat FBK protein**

375 The heat map presented in Fig 3 showed that the expression of *TaFBK19* was strongly up-regulated  
376 under DS treatment and sharply down-regulated under HS treatment at 1 h, while the combined heat  
377 and drought (HD) treatment resulted in *TaFBK19* in low level from 1 to 6 h. This gene was selected  
378 for further investigation of its expression pattern by qRT-PCR. At first, we cloned the full-length  
379 (1327 bp) cDNA sequence from TcLr15 wheat seedlings inoculated with the leaf rust strain  
380 05-19-43<sup>②</sup>. The cDNA encodes a polypeptide with 383 amino acids. The MW of the predicted  
381 polypeptide was 40.69 kDa, and the predicted *pI* was 5.11. BLASTx analysis showed the sequence  
382 shared very high similarity (94%) with an F-box protein, AFR-like, from *Aegilops tauschii* (GenBank:  
383 XP 020194469.1). TaBFK19 protein carries a single highly conserved F-box domain (32-71 aa sites)  
384 at the N-terminus and a fairly divergent Kelch domain (136-174 aa sites) at the middle region (Fig 4A).  
385 Phylogenetic analysis indicated that the TaBFK19 protein shared 94.10% and 87.47% similarity with

386 AFR from *A. tauschii* and *Hordeum vulgare*, respectively, followed by AFR from *Brachypodium*  
387 *distachyon*, *O. sativa*, *Setaria italica*, *Panicum hallii*, *S. bicolor* and *Zea mays*. Meanwhile, AFRs from  
388 woody plants (*Prunus avium*, *Musa acuminata*, *Elaeis guineensis*, *Phoenix dactylifera*) and dicots  
389 (*Nelumbo nucifera*, *Dendrobium catenatum* and *A. thaliana*) were grouped in different clades (Fig 4C),  
390 which indicates that these FBKs were conserved in monocots. Based on the similarities between  
391 *TaFBK19* and *AFR* genes from the cereal and monocot, *TaFBK19* will henceforth be described as  
392 *TaAFR*. Sequence analyses of TaAFR did not reveal any predicted signal peptide or transmembrane  
393 domains, and the protein is predicted to localize to the cytosol. The predicted 3D structure showed  
394 three distinct  $\alpha$ -helices at the N-terminus and  $\beta$ -sheets at the C-terminal end. The  $\beta$ -sheets are  
395 predicted to form 6 triangles, which further cluster to a regular hexagonal arrangement. These  
396 secondary and ultra-secondary structures indicated that the protein folds into chair-like configuration  
397 (Fig 4B).

398 **Fig 4. Sequence characteristics of wheat TaAFR.** (A) Functional domain of TaAFR. A schematic  
399 diagram showing the positions of F-box domain and Kelch domain in TaAFR; (B) 3D structure  
400 prediction of the TaAFR protein. The blue helix represented the  $\alpha$ -helix structure, and the arrow  
401 represented the  $\beta$ -sheet structure. Blue and red differentiate the N- and the C-terminus, respectively;  
402 (C) Phylogenetic analysis of TaAFR with F-box proteins from different plants species. The  
403 phylogenetic tree was generated using the neighbour-joining method in MEGA 7. Branches were  
404 labeled with the GenBank accession number followed by species name.

#### 405 ***TaAFR* is primarily expressed in wheat leaves**

406 Six tissues were sampled from wheat TcLr15 seedlings (root, leaf and stem) and adult plants (pistil,

407 stamen, flag leaf) to analyze the tissue-specific expression of *TaAFR*. The young leaf was used as a  
408 control (the expression value was set 1.0) to measure its relative expression to other tissues. *TaAFR*  
409 was mainly expressed in young leaf, with lower expression in the flag leaf and extremely low  
410 expression was detected in young root, pistil, and stamen (Fig 5A).

411 **Fig 5. The expression patterns of *TaAFR* in different wheat tissues and stress/hormone**

412 **treatments.** (A) Expression profile of *TaAFR* in different tissues of TcLr15; (B) Expression patterns  
413 of *TaAFR* gene in incompatible and compatible combinations of TcLr15/*Puccinia triticina* strains  
414 05-19-43② and 05-5-137③; (C) Effects of SA, ABA and MeJA on expression of *TaAFR* in TcLr15  
415 leaves; (D) Effects of NaCl, PEG and H<sub>2</sub>O<sub>2</sub> on expression of *TaAFR* in TcLr15 leaves. The control  
416 leaf of TcLr15 were sampled at the corresponding time points, and these samples was used as the  
417 subject to be subtracted. Different letters indicate significant differences ( $p < 0.05$ ) for tissue-specific  
418 comparisons; An asterisk, \*, marks the significant difference between treatment and the 0 h untreated  
419 control ( $p < 0.05$ ).

420 **Differential expression of *TaAFR* in compatible and incompatible**  
421 **wheat/leaf rust pathogen combinations**

422 After inoculation with different virulent leaf rust strains, the temporal expression profile of *TaAFR* in  
423 TcLr15 is shown in Fig 5B. Generally, the *TaAFR* transcript was higher in the compatible interaction  
424 (TcLr15 inoculated with 05-5-137③) than in the incompatible one (TcLr15 inoculated with  
425 05-19-43②) except 48 hpi. For the incompatible interaction, the *TaAFR* transcripts gradually  
426 increased from 6 to 96 hpi, but apart from the initial increase from 0 to 6 h, no significant difference  
427 was observed across the time course. In the compatible interaction, no significant change was

428 observed between 0 to 48 hpi, but a rapid increase was observed at 96 hpi, where the expression of  
429 *TaAFR* transcripts was 3.1-fold higher than in the 0 h untreated control samples.

### 430 **Exogenous SA and ABA applications significantly up-regulated the** 431 **expression of *TaAFR***

432 The expression pattern of *TaAFR* in TcLr15 following exogenous treatment with plant hormones is  
433 presented in Fig 5C. In response to SA treatments, *TaAFR* expression was down-regulated 2-fold at 2  
434 and 6 h compared with the untreated control, and thereafter increased rapidly 4-fold at 12 h compared  
435 with the control before returning to the basal expression levels. In response to ABA, *TaAFR*  
436 expression increased rapidly by 3.5 folds, observed at 2 h, and continued to be up-regulated  
437 throughout the time course, decreasing gradually until 48 h where basal level expression was observed.  
438 MeJA application resulted in significant down-regulation of *TaAFR* at most time points, except at 12  
439 and 24 h, where no significant difference was observed compared with the control.

### 440 **Expression of *TaAFR* is affected by salt, drought and oxidative stresses**

441 Three abiotic stress treatments, salt (NaCl), drought (PEG) and oxidative stress (H<sub>2</sub>O<sub>2</sub>), were evaluated  
442 for their effects on *TaAFR* expression in TcLr15 seedlings. The expression of *TaAFR* was significantly  
443 affected in TcLr15 after treatment with NaCl (Fig 5D). The transcripts were strongly up-regulated  
444 from 0.5 h, and maintained a high level of expression until 12 h. Two expression peaks occurred at 0.5  
445 h (8.2-fold) and 6 h (7.9-fold), respectively. Thereafter, the *TaAFR* transcripts started to down-regulate  
446 gradually, until 48 h, where transcripts dropped to half of the level detected in the 0 h untreated  
447 controls. In response to PEG treatments, the *TaAFR* transcript was increased in abundance at 0.5 h  
448 (3.9-fold), 2 h (2.1-fold), 6 h (4.1-fold) and 24 h (3-fold), but was down-regulated at 48 h. After

449 treatment with H<sub>2</sub>O<sub>2</sub>, the expression of *TaAFR* did not differ from that of the control until 2 h after  
450 treatment when it was down-regulated, but from 6 h to 24 h, *TaAFR* showed an upward trend, reaching  
451 a peak at 24 h where it was 7.8-fold higher than that of the 0 h control. Finally, expression dropped  
452 below the 0 h control levels at 48 h (Fig 5D).

### 453 **TaAFR is localized to the nucleus and cytoplasm**

454 *Nicotiana benthamiana* was injected with GV3101 containing either the empty vector 35S:*GFP* or the  
455 recombinant vector 35S:*TaAFR-GFP*, and transient expression of the recombinant proteins was  
456 observed. The fluorescence signal of 35S:*GFP* was visualised in both the nucleus and cytoplasm after  
457 36 h transfection (Fig 6), whereas the fluorescence signal of 35S:*TaAFR-GFP* was detected after 48 h,  
458 predominantly observed in the nucleus and cytoplasm. Moreover, the nuclear dye DAPI was used to  
459 stain the tobacco leaves after transfection, light blue was clearly observed in the nucleus.

460 **Fig 6. Fluorescence observation for subcellular localization of TaAFR.** The free GFP protein and

461 TaAFR-GFP fusion protein were transiently expressed in the *N. benthamiana* by

462 *Agrobacterium*-mediated transformation. GFP, GFP fluorescent signal channel; Bright field, ordinary

463 light channel; DAPI, nuclei were stained by DAPI; Merge, merge of GFP, Bright field and DAPI.

464 Bar=20 μm.

### 465 **Screening and identifying the partner proteins interacting with**

### 466 **TaAFR**

### 467 **Thirteen types of proteins putatively interacted with TaAFR**

468 To identify candidate upstream and/or downstream proteins interacting with TaAFR in wheat, we

469 screened a yeast library carrying the cDNA of TcLr15 inoculated with incompatible leaf rust strain  
470 against the bait construct, *BD-TaAFR*. Clones from positive interactions were sequenced and thirteen  
471 candidate proteins were identified from 47 clones. Candidate proteins are listed in S4 Table, and  
472 categorized into the following 5 groups: photosynthesis, stress resistance, transportation, basal  
473 metabolism and unknown protein. Among these, 5 stress resistance related proteins were obtained:  
474 such as Peroxidase 51-like (POD), obtusifoliol 14-alpha-demethylase (CYP51), Glucan  
475 endo-1,3-beta-glucosidase 14 (GV), Laccase-7 (Lac7) and leucine-rich repeat protein 1 (LRR-8  
476 Superfamily) (LRR) [31-35]. Meanwhile, transport related proteins, ADP-ribosylation factor 2-like  
477 isoform X1 (ARL2) and SEC1 family transport protein SLY1 (SLY1) and basal metabolism related  
478 protein Skp1/ASK1-like protein (Skp1) were also detected [36, 37, 3].

#### 479 **TaSkp1, TaARL2 and TaPAL interacted with TaAFR**

480 Based on the results of Y2H library screening, we obtained the complete coding region of Rubisco,  
481 Skp1, ARL2, GV, RP, SLY1, NADH, POD, LRR, Lac7 and CYP51, from TcLr15 for further  
482 validation of protein interactions. According to Zhang et al. , Kelch repeat F-box proteins are regulated  
483 by phenylpropanoid biosynthesis by controlling the turnover of phenylalanine ammonia-lyase (PAL)  
484 [11]; therefore, in addition to the positive interactions identified in the Y2H assay, we isolated a *PAL*  
485 gene from TcLr15. Basic characteristics of these proteins are presented in S5 Table. The interactions  
486 were first re-verified by Y2H. Colonies with blue pigments are indicative of positive interactions, and  
487 along with the positive control, six such interactions were observed: *BD-TaAFR* and *AD-TaSkp1*,  
488 *BD-TaAFR* and *AD-TaSLY1*, *BD-TaAFR* and *AD-TaARL2*, *BD-TaAFR* and *AD-TaCYP51*,  
489 *BD-TaAFR* and *AD-TaPAL*, *BD-TaAFR* and *AD-TaNADH*. The remaining combination, along with  
490 the negative control, did not grow on the SD-WHLA plates. These results suggest TaAFR might

491 physically interact with TaSkp1, TaSLY1, TaARL2, TaCYP51, TaPAL and TaNADH (Fig 7).

492 **Fig 7. Protein interactions tested by Y2H.** Yeast was cultivated on SD-WLHA+X- $\alpha$ -Gal plates for  
493 3-5 days.

494 To further validate the above results, these 6 interactions were tested by BiFC. In this approach, the  
495 coding region of the *TaAFR* was inserted downstream of the c-Myc tag of pSPY CE vector (pSPY  
496 CE-*TaAFR*); meanwhile the ORFs of *TaSkp1*, *TaSLY1*, *TaARL2*, *TaCYP51*, *TaPAL* and *TaNADH*  
497 were inserted downstream of the 35S promoter in the pSPY NE vector (pSPY NE-*Prey*). The pSPY  
498 CE-*TaAFR* vector was used co-transfection of tobacco leaves with each of the pSPY NE-*Prey*  
499 constructs. If the gene products of the two constructs interact, a fluorescence signal will be emitted.  
500 Among the six combinations, three were found to emit fluorescent signals (Fig 8). pSPY CE-*TaAFR*  
501 and pSPY NE-*TaSkp1* emitted fluorescent signal in the nucleus and cytoplasm 40 h after injection.  
502 The pSPY CE-*TaAFR* and pSPY NE-*TaARL2* emitted a strong signal in the nucleus and cytoplasm 48  
503 h after co-transfection. The pSPY CE-*TaAFR* and pSPY NE-*PAL* interaction was observed in the  
504 cytoplasm by complementary chimeric fluorescence signals 40 h after co-transfection. Thus, the BiFC  
505 assay further validated *TaAFR* interactions with *TaSkp1*, *TaARL2*, and *TaPAL*.

506 **Fig 8. Verification of protein interactions by BiFC.** The fluorescence microscope (Nikon Ti 2,  
507 Japan) with an excitation wavelength of 495 nm was used to observe fluorescence signal. Three  
508 independent experiments were conducted for each combination. Bar= 20  $\mu$ m.

509 Co-IP assays were performed upon transient expression in *N. benthaminana* to further validate the  
510 results tested by Y2H and BiFC *in vivo*. The combinations of *TaAFR* with three putative partner



511 proteins TaSkp1, TaARL2, TaPAL and negative control GFP were successfully detected in the whole  
512 cell lysates (WCL). After IP by HA-magnetic beads, the eluted proteins were subjected to immunoblot  
513 analysis with anti-FLAG antibody, we found that TaSkp1, TaARL2 and TaPAL were  
514 immunoprecipitated with TaAFR since a single band appeared at their corresponding MW sites, but no  
515 band except HC (IgG heavy chain) was detected in the combination of TaAFR and GFP (Fig 9). Taken  
516 together, these observations support that TaAFR interact with TaSkp1, TaARL2 and TaPAL *in vivo*.

517 **Fig 9. Verification of protein interactions by Co-IP.** Proteins were extracted from leaves of *N.*  
518 *benthamiana* 60 h co-injection, and immunoblotting (IB) was used to detect the expression of TaAFR,  
519 TaSkp1, TaARL2, TaPAL and GFP in the whole cell lysates (WCL) with HA or FLAG antibody,  
520 these proteins were immunoprecipitated by HA-magnetic beads, then the eluted proteins were  
521 subjected to IB analysis with anti-FLAG antibody. HC: IgG heavy chain. Marker: 25-90 kDa.

## 522 **The F-box domain of TaAFR interacted with TaSkp1, and the Kelch** 523 **domain with TaARL2 and TaPAL**

524 To determine which domain of TaAFR is responsible for recognizing the TaSkp1, TaARL2 and  
525 TaPAL, we further obtained the cDNA sequences of F-box domain (1-71 aa) and Kelch (72-383 aa)  
526 domain of TaAFR, then constructed recombinant BD vector for each. Six combinations of AD-*TaSkp1*  
527 and BD-*TaAFR-F-box*, AD-*TaSkp1* and BD-*TaAFR-Kelch*, AD-*TaARL2* and BD-*TaAFR-F-box*,  
528 AD-*TaARL2* and BD-*TaAFR-Kelch*, AD-*TaPAL* and BD-*TaAFR-F-box*, AD-*TaPAL* and  
529 BD-*TaAFR-Kelch* were verified using the Y2H assay. Among them, three combinations of  
530 AD-*TaSkp1* and BD-*TaAFR-F-box*, AD-*TaARL2* and BD-*TaAFR-Kelch*, AD-*TaPAL* and  
531 BD-*TaAFR-Kelch* grew well on the SD-WLHA+X- $\alpha$ -Gal plates (Fig 10). These results indicated that

532 TaSkp1 interacted with the F-box domain, while TaARL2 and TaPAL were recognized by the Kelch  
533 domain of TaAFR.

534 **Fig 10. Domain interactions tested by Y2H.** Yeast was cultivated on SD-WLHA+X- $\alpha$ -Gal plates for  
535 3-5 days.

## 536 **Discussion**

537 In plants, the Kelch type F-box protein is one of the most common subfamilies in the F-box family  
538 [38]. Many wheat databases are being continuously updated, with improved annotations over recent  
539 years, making it possible for genome-wide identification and comprehensive analysis of gene families.  
540 In 2020, Hong et al. reported 41 wheat F-box/Kelch genes, and our previous result from searching  
541 against Phytozome 12 (v2.2) database identified 59 wheat F-box/Kelch genes [39, 40]. In the present  
542 study, we screened latest IWGSC database in EnsemblPlants with more seed sequences and identified  
543 68 *TaFBKs* encoding 74 putative proteins. The *TaFBK* subfamily was divided into 7 categories based  
544 on differences in number of the Kelch domains. Most of the *AtFBKs* resolved to clade G and showed  
545 relatively distant evolutionary relationship compared with the four Gramineae species, while *TaFBKs*  
546 grouped into the same clade or closer to *OsFBKs*, *SbFBKs* and *ZmFBKs* according to their  
547 construction of their functional domains. Compared with the Arabidopsis *FBK* subfamily, three types  
548 of *FBKs*, namely F-box+4 Kelch, PAC+F-box+4 Kelch and LSM14+F-box+2 Kelch, were not  
549 detected in wheat. Each of these types are poorly represented in Arabidopsis, with only one member  
550 for each. It may be that they are absent in wheat due to selective evolution of the species, or it may  
551 simply be that they cannot yet be detected at the current sequencing depth or annotation of the wheat  
552 protein database. F-box+1 Kelch+RING and LSM14+F-box+2 Kelch were found to be unique *FBK*

553 types in rice and Arabidopsis, respectively.

554 Studies have shown that FBKs can be localized to the nucleus, cytoplasm and/or organelles. For  
555 example, CarF-Box1 (chickpeas) and TML (legume) were localized to the nucleus, while  
556 TaKFB1-TaKFB5 (colored wheat) were each co-localized to both the nucleus and cytoplasm [41, 42,  
557 39]. The wheat FBKs identified herein, were predicted to localize in the nucleus, cytoplasm, plastid  
558 and/or other organelles. These predictions may provide some insights into potential gene function, but  
559 may not always be accurate. For example, the wheat FBK, TaAFR (TaFBK19), was predicted to  
560 localize in the cytosol, but was shown experimentally herein to localize in both the nucleus and the  
561 cytoplasm.

562 To glean some insights into the potential functionality of the wheat FBKs, their expression was  
563 observed in response to different stresses. An initial *in silico* analysis was carried out by comparing  
564 expression of 47 *TaFBKs* in their response to DS, HS, and HD. These 47 genes showed varied  
565 expression patterns in response to these differential treatments, most of them showed strong  
566 down-regulation in wheat treating with HS. *TaAFR* was further selected to observe its' expression  
567 patterns related with abiotic/biotic stresses and hormones. NaCl and H<sub>2</sub>O<sub>2</sub> caused most strong  
568 up-regulation of *TaAFR*, moreover, *TaAFR* represented different expression patterns in TcLr15  
569 inoculating with virulent/avirulent leaf rust pathogen. Many previous studies have reported similar  
570 observations for the expression of different plant *FBKs* in response to different abiotic and biotic stress.  
571 For example, the nuclear localized FBK gene *CarF-box1* from chickpea was shown to play an  
572 important role in abiotic stress, where expression levels of this gene were significantly up-regulated  
573 after drought and salt treatments, but was down-regulated under heat and cold stresses [41]. The grape  
574 FBK gene *BIG24.1* was up-regulated by Botrytis infection in grapes, and the up-regulation expression

575 of this gene also affected the plants response to other biotic and abiotic stresses [43]. In another  
576 example, the F-box protein containing two Kelch repeats in sugar beet, homologous to Arabidopsis  
577 FBK AT1G74510, was found to interact with the beet necrotic yellow vein virus pathogenicity factor  
578 P25, and it was speculated that P25 could affect the formation of SCF complex [44].

579 Biotic and abiotic stress responses are often regulated by plant signaling hormones and exposure to  
580 such stresses can activate these pathways [45]. It is therefore interesting that the expression of *TaAFR*  
581 was also affected by three different plant hormones. SA, ABA and MeJA treatments had a medium  
582 effect on the expression of *TaAFR*, suggesting that this gene may regulate and be regulated by  
583 different plant hormones. A regulatory behavior in plant hormone responses would be consistent with  
584 various other FBKs in the hormone signaling pathways [22, 24].

585 FBKs interact both with other members of the UPS and with downstream targets for proteasome  
586 degradation; identification of some of these interacting proteins can further provide insight into the  
587 function of this protein. A multifaceted approach was employed to identify and validate candidate  
588 interactions. First, using a leaf rust pathogen treated TcLr15 wheat leaf cDNA library, a Y2H library  
589 screen was utilized as a broad scale approach to fish for candidate interacting proteins. A total of 13  
590 candidates were identified, and 11 of these were cloned and re-screened by Y2H for interactions with  
591 *TaAFR*. Additionally, a *PAL* gene, which was not identified in the pool, but has been shown to be  
592 involved in regulation process of FBKs, was added to the list. Among these, a total of 6 interactions,  
593 including the *TaAFR-TaPAL* interaction, were confirmed positives. However, since Y2H assays can  
594 pick up false positives, these 6 genes were then validated using the BiFC and Co-IP methods, and  
595 finally three partner proteins interacting with *TaAFR* were confirmed: *TaSkp1*, *TaARL2*, and *TaPAL*.

596 To further characterize their detailed interacting domain, another Y2H assay was carried out

597 between the F-box and Kelch domains of TaAFR with each of these proteins. TaSkp1 was shown to  
598 interact with the F-box domain but not with the Kelch domain. This was not unexpected since Skp1 is  
599 a known component of the SCF complex and F-box proteins interact with Skp1 via the F-box domain.  
600 This result provides preliminary evidence that TaAFR forms part of the SCF complex. Meanwhile, the  
601 other two proteins, TaARL2 and TaPAL, were shown to interact with the Kelch domain, and not the  
602 F-box domain, suggesting that these two proteins are targeted by TaAFR for ubiquitination and  
603 designated for proteolytic degradation.

604 ADP ribosylation factor (ARF) family of small GTP binding proteins regulates a wide range of  
605 cellular processes in eukaryotes [46]. According to Guan et al. , three ARF genes (*PvArf1*, *PvArf-B1C*  
606 and *PvArf-related*) were identified and localized in the nucleus and cytoplasm, which regulated proline  
607 biosynthesis by physically interacting with PvP5CS1 to improve salt tolerance in Switchgrass  
608 (*Panicum virgatum* L.) [47]. The latest research showed that wheat contains 74 *TaARF* genes. The  
609 expression of *TaARF1* genes was regulated by biotic stress (powdery mildew and stripe rust  
610 pathogens) and abiotic stress (cold, heat, drought and NaCl), and may be related to the ABA signaling  
611 pathway [48]. ARL2 (ADP-ribosylation factor 2-like) is most closely related to the ARL2 subfamily  
612 of ARF-like (ARL) proteins. ARL2 localizes in the cytosol, centrosomes, nucleus, and mitochondria  
613 [49]. Arabidopsis *TTN5* encodes an ARL protein, and functioned throughout the Arabidopsis life cycle,  
614 with an important role in the regulation of intracellular vesicle transport [36]. Most of the previous  
615 research of ARL2 had been focused mainly on humans and yeasts, with little information in plants.  
616 Thus, future studies on the interaction of TaAFR and TaALR2 may provide valuable insights in the  
617 function of both proteins in plants.

618 PAL activity is modulated by abiotic/biotic stresses in plants, including infections with fungal

619 pathogens, UV/blue light irradiation, and wounding [50]. Zhang et al. found that differential  
620 expression of an Arabidopsis *FBK* genes affected the stability of PAL, and PAL isozymes were shown  
621 to physically interact with FBKs both *in vitro* and *in vivo* [11]. The interaction of PAL with FBKs  
622 thereby controls phenylpropanoid biosynthesis by mediating the ubiquitination and subsequent  
623 degradation of PAL. In another study, the authors showed that the Arabidopsis FBK protein, KFB39, a  
624 homolog of AtKFB50, also interacted with PAL isozymes and regulated PAL stability and activity,  
625 thereby participating in the plant's tolerance to UV irradiation [12]. In the work presented herein,  
626 TaAFR interacted with PAL, presumably through the Kelch domain which was also shown to interact  
627 with PAL. These results, together with the observations of Arabidopsis FBK activity in Zhang et al. ,  
628 point to the possibility that TaAFR regulates PAL stability and activity in the wheat response to  
629 abiotic/biotic stresses [11, 12]. Meanwhile, the work presented in this manuscript provides a glimpse  
630 into their potential function, and opens the door for future studies to further characterize these genes.

## 631 **Conclusion**

632 A total of 68 *TaFBK* genes encoding for 74 proteins were identified in wheat in a genome-wide survey.  
633 The FBK proteins from wheat, Arabidopsis and three important monocots were grouped into 7 clades  
634 according to the number of Kelch domain. 68 *TaFBK* genes were unevenly distributed on 21 wheat  
635 chromosomes, *TaFBKs* differentially expressed at multiple developmental stages and tissues, and in  
636 response to drought and/or heat stresses by *in silico* analysis. A Kelch type F-box gene *TaAFR* was  
637 isolated and identified to localize in the nucleus and cytoplasm, which primarily expressed in wheat  
638 leaves, and also revealed varied expression patterns in response to treatments with leaf rust pathogens,  
639 exogenous hormones, and abiotic stresses. Skp1 interacted with the F-box domain of TaAFR, while  
640 ARL2 and PAL were recognized by Kelch domain. This work provides a foundation from which to

641 build more detailed research inquiries into the function of the numerous wheat FBKs and also to  
642 further characterize the *TaAFR* gene.

## 643 **Author contributions**

644 **Conceptualization:** Chunru Wei, Xiumei Yu.

645 **Data curation:** Chunru Wei, Runqiao Fan.

646 **Investigation:** Chunru Wei, Yuyu Meng.

647 **Software:** Chunru Wei.

648 **Writing - original draft preparation:** Chunru Wei.

649 **Methodology:** Yiming Yang, Xiaodong Wang.

650 **Writing - review & editing:** Weiquan Zhao, Nora A. Foroud, Daqun Liu, Xiumei Yu.

651 **Funding acquisition:** Xiumei Yu.

652 **Project administration:** Xiumei Yu.

## 653 **References**

654 1. Nguyen KM, Busino L. The biology of F-box proteins: The SCF family of E3 ubiquitin ligases.

655 *Adv Exp Med Biol.* 2020; 1217: 111-122. doi: 10.1007/978-981-15-1025-0\_8

656 2. Au W, Zhang T, Mishra P K, Eisenstatt JR, Walker RL, Ocampo J, et al. Skp, Cullin, F-box

657 (SCF)-Met30 and SCF-Cdc4-mediated proteolysis of CENP-A prevents mislocalization of

658 CENP-A for chromosomal stability in budding yeast. *PLoS Genet.* 2020; 16: e1008597. doi:

659 10.1371/journal.pgen.1008597

- 660 3. HajSalah El Beji I, Mouzeyar S, Bouzidi MF, Roche J. Expansion and functional diversification of  
661 SKP1-like genes in wheat (*Triticum aestivum* L.). *Int J Mol Sci.* 2019; 20: 3295–3312. doi:  
662 10.3390/ijms20133295
- 663 4. Jain MK, Nijhawan A, Arora R, Agarwal A, Ray S, Sharma P, et al. F-box proteins in rice.  
664 Genome-wide analysis, classification, temporal and spatial gene expression during panicle and seed  
665 development, and regulation by light and abiotic stress. *Plant Physiol.* 2007; 143: 1467-1483. doi:  
666 10.1104/pp.106.091900
- 667 5. Xue F, Cooley L. Kelch encodes a component of intercellular bridges in *Drosophila* egg chambers.  
668 *Cell.* 1993; 72: 681-693. doi: 10.1016/0092-8674(93)90397-9
- 669 6. Xu G, Ma H, Nei M, Kong HZ. Evolution of F-box genes in plants: Different modes of sequence  
670 divergence and their relationships with functional diversification. *Proc Natl Acad Sci USA.* 2009;  
671 106: 835-840. doi: 10.1073/pnas.0812043106
- 672 7. Schumann N, Navarroquezada A, Ullrich KK, Kuhl C, Quint M. Molecular evolution and selection  
673 patterns of plant F-box proteins with C-terminal Kelch repeats. *Plant Physiol.* 2011; 155: 835-850.  
674 doi: 10.1104/pp.110.166579
- 675 8. Imaizumi T, Schultz TF, Harmon FG, Ho LA, Kay SA. FKF1 F-box protein mediates cyclic  
676 degradation of a repressor of CONSTANS in Arabidopsis. *Science.* 2005; 309: 293-297. doi:  
677 10.1126/science.1110586
- 678 9. Shao T, Qian Q, Tang D, Chen J, Li M, Cheng ZK, et al. A novel gene IBF1 is required for the  
679 inhibition of brown pigment deposition in rice hull furrows. *Theor Appl Genet.* 2012; 125: 381-390.  
680 doi: 10.1007/s00122-012-1840-8



- 681 10. Curtis RHC, Powers SJ, Napier J, Napier JA, Matthes MC. The Arabidopsis F-box/Kelch-repeat  
682 protein At2g44130 is upregulated in giant cells and promotes nematode susceptibility. *Mol Plant*  
683 *Microbe Interact.* 2013; 26: 36-4310. doi: 10.1094/MPMI-05-12-0135-FI
- 684 11. Zhang X, Gou M, Liu CJ. Arabidopsis Kelch repeat F-box proteins regulate phenylpropanoid  
685 biosynthesis via controlling the turnover of phenylalanine ammonia-lyase. *Plant Cell.* 2013; 25:  
686 4994-5010. doi: 10.1105/tpc.113.119644
- 687 12. Zhang X, Gou M, Guo C, Yang HJ, Liu CJ. Down-regulation of Kelch domain-containing F-box  
688 protein in Arabidopsis enhances the production of (poly) phenols and tolerance to ultraviolet  
689 radiation. *Plant Physiol.* 2015; 167: 337-350. doi: 10.1104/pp.114.249136
- 690 13. Appels R, Eversole K, Stein N, Feuillet C, Keller B, Rogers J, et al. Shifting the limits in wheat  
691 research and breeding using a fully annotated reference genome. *Science.* 2018; 361: e7191. doi:  
692 10.1126/science.aar7191
- 693 14. Jia FJ, Wu BJ, Li H, Huang JG, Zheng CC. Genome-wide identification and characterisation of  
694 F-box family in maize. *Mol Genet Genomics.* 2013; 288: 559-577. doi:  
695 10.1007/s00438-013-0769-1
- 696 15. Liu R, Meng J. MapDraw: a microsoft excel macro for drawing genetic linkage maps based on  
697 given genetic linkage data. *Hereditas.* 2003; 25: 317-321. doi:  
698 10.3321/j.issn:0253-9772.2003.03.019
- 699 16. Hou XJ, Li SB, Liu SR, Hu CG, Zhang JZ. Genome-wide classification and evolutionary and  
700 expression analyses of citrus MYB transcription factor families in sweet orange. *PLoS ONE.* 2014;  
701 9: e11237542. doi: 10.1371/journal.pone.0112375

- 702 17. Cannon SB, Mitra A, Baumgarten A, Young ND, May G. The roles of segmental and tandem gene  
703 duplication in the evolution of large gene families in *Arabidopsis thaliana*. BMC Plant Biol. 2004;  
704 4: 10-10. doi: 10.1186/1471-2229-4-10
- 705 18. Choulet F, Alberti A, Theil A, Glover N, Barbe V, Daron J, et al. Structural and functional  
706 partitioning of bread wheat chromosome 3B. Science. 2014; 345: e124972143. doi:  
707 10.1126/science.1249721
- 708 19. Liu Z, Xin M, Qin J, Peng H, Ni Z, Yao Y, et al. Temporal transcriptome profiling reveals  
709 expression partitioning of homeologous genes contributing to heat and drought acclimation in  
710 wheat (*Triticum aestivum* L.). BMC Plant Biol. 2015; 15:152. doi: 10.1186/s12870-015-0511-8
- 711 20. Yu X, Zhao W, Yang W, Liu F, Chen J, Goyer C, et al. Characterization of a hypersensitive  
712 response-induced gene *TaHIR3* from wheat leaves infected with leaf rust. Plant Mol Biol Rep.  
713 2013; 31: 314-322. doi: 10.1007/s11105-012-0504-9
- 714 21. Li FT, Chen XL, Liu CG, Sun Y, Ma H, Zhang T, et al. Effects of different nutrient solutions on  
715 growth and ornamental quality of hydroponic *Hyacinthus orientalis* L. Journal of Central South  
716 University of Forestry & Technology. 2012; 32: 130-134. doi:  
717 10.14067/j.cnki.1673-923x.2012.10.021
- 718 22. Hong MJ, Kim DY, Kang SY, Kim DS, Kim JB, Seo YW. Wheat F-box protein recruits proteins  
719 and regulates their abundance during wheat spike development. Mol Biol Rep. 2012; 39:  
720 9681-9696. doi: 10.1007/s11033-012-1833-3
- 721 23. Cao Y, Ji HT, Pei XX, Zheng J, Wang M, Ma XF, et al. Evaluation of drought resistance of six  
722 winter wheat seeds under PEG simulated drought stress. Journal of Shanxi Agricultural Sciences.  
723 2016; 44: 723-725

- 724 24. Kim YY, Cui MH, Noh MS, Jung KW, Shin JS. The FBA motif-containing protein AFBA1 acts as  
725 a novel positive regulator of ABA response in Arabidopsis. *Plant Cell Physiol.* 2017; 58: 574-586.  
726 doi: 10.1093/pcp/pcx003
- 727 25. An C, Mou Z. Salicylic acid and its function in plant immunity. *J Integr Plant Biol.* 2011; 53:  
728 412-428. doi: 10.1111/j.1744-7909.2011.01043.x
- 729 26. Lim J, Lim CW, Lee SC. Functional analysis of pepper F-box protein CaDIF1 and its interacting  
730 partner CaDIS1: Modulation of ABA signalling and drought stress response. *Front Plant Sci.* 2019;  
731 10: 1365. doi: 10.3389/fpls.2019.01365
- 732 27. Wei CR, Fan RQ, Meng YY, Yang YM, Wang XD, Laroche A, et al. Molecular identification and  
733 acquisition of interacting partners of a novel wheat F-box/Kelch gene *TaFBK*. *Physiol Mol Plant*  
734 *P.* 2020; 112: e101564. doi: 10.1016/j.pmpp.2020.101564
- 735 28. Zhu L, Huq E. Characterization of light-regulated protein-protein interactions by in vivo  
736 coimmunoprecipitation (Co-IP) assays in plants. *Methods Mol Biol.* 2019; 2026:29-39. doi:  
737 10.1007/978-1-4939-9612-4\_3
- 738 29. Koralewski TE, Krutovsky KV. Evolution of exon-intron structure and alternative splicing. *PLoS*  
739 *ONE.* 2011; 6: e18055. doi: 10.1371/journal.pone.0018055
- 740 30. Jin J, Cardozo T, Lovering RC, Elledge SJ, Pagano M, Harper JW. Systematic analysis and  
741 nomenclature of mammalian F-box proteins. *Genes Dev.* 2004; 18: 2573-2580. doi:  
742 10.1101/gad.1255304
- 743 31. Beffa RS, Neuhaus JM, Meins F. Physiological compensation in antisense transformants: specific  
744 induction of an "ersatz" glucan endo-1,3-beta-glucosidase in plants infected with necrotizing  
745 viruses. *Proc Natl Acad Sci USA.* 1993; 90: 8792-8796. doi: 10.1073/pnas.90.19.8792

- 746 32. Hong SH, Lee SS, Chung JM, Jung HS, Singh S, Mondal S, et al. Site-specific mutagenesis of  
747 yeast 2-Cys peroxiredoxin improves heat or oxidative stress tolerance by enhancing its chaperone  
748 or peroxidase function. *Protoplasma*. 2017; 254: 327-334. doi: 10.1007/s00709-016-0948-0
- 749 33. Wang Q, Li G, Zheng K, Zhu X, Ma J, Wang D, et al. The soybean Laccase gene family:  
750 Evolution and possible roles in plant defense and stem strength selection. *Genes*. 2019; 10: 9. doi:  
751 10.3390/genes10090701
- 752 34. Bianchet C, Wong A, Quaglia M, Alqurashi M, Gehring C, Ntoukakis V, et al. An *Arabidopsis*  
753 *thaliana* leucine-rich repeat protein harbors an adenylyl cyclase catalytic center and affects  
754 responses to pathogens. *J Plant Physiol*. 2019; 232: 12-22. doi: 10.1016/j.jplph.2018.10.025
- 755 35. Binjubair FA, Parker JE, Warrilow AG, Puri K, Braidley PJ, Tatar E, et al. Small-molecule  
756 inhibitors targeting sterol 14 $\alpha$ -demethylase (CYP51): Synthesis, molecular modelling and  
757 evaluation against *Candida albicans*. *ChemMedChem*. 2020; 15: 1294-1309. doi:  
758 10.1002/cmdc.202000250
- 759 36. McElver J, Patton D, Rumbaugh M, Liu CM, Yang LJ, Meinke DW. The TITAN5 gene of  
760 *Arabidopsis* encodes a protein related to the ADP ribosylation factor family of GTP binding  
761 proteins. *Plant Cell*. 2000; 12: 1379-1392. doi: 10.1105/tpc.12.8.1379
- 762 37. Toonen Ruud FG, Verhage M. Vesicle trafficking: pleasure and pain from SM genes. *Trends Cell*  
763 *Biol*. 2003; 13: 177-186. doi: 10.1016/S0962-8924(03)00031-X
- 764 38. Hassan MN, Zainal Z, Ismail I. Plant Kelch containing F-box proteins: structure, evolution and  
765 functions. *RSC Adv*. 2015; 5: 42808-42814. doi: 10.1039/C5RA01875G

- 766 39. Hong MJ, Kim DY, Choi H, Seo YW, Kim J. Isolation and characterization of Kelch  
767 repeat-containing F-box proteins from colored wheat. *Mol Biol Rep.* 2020; 47: 1129-1141. doi:  
768 10.1007/s11033-019-05210-x
- 769 40. Li HY, Wei CR, Meng YY, Fan RQ, Zhao WQ, Wang XD, et al. Identification and expression  
770 analysis of some wheat F-box subfamilies during plant development and infection by *Puccinia*  
771 *tritricina*. *Plant Physiol Bioch.* 2020; 155: 535–548. doi: 10.1016/j.plaphy.2020.06.040
- 772 41. Jia Y, Gu H, Wang X, Chen QJ, Shi SB, Zhang JS, et al. Molecular cloning and characterization of  
773 an F-box family gene *CarF-box1* from chickpea (*Cicer arietinum* L.). *Mol Biol Rep.* 2012; 39:  
774 2337-2345. doi: 10.1007/s11033-011-0984-y
- 775 42. Takahara M, Magori S, Soyano T, Okamoto S, Yoshida C, Yano C, et al. TOO MUCH LOVE, a  
776 novel Kelch repeat-containing F-box protein, functions in the long-distance regulation of the  
777 legume-rhizobium symbiosis. *Plant Cell Physiol.* 2013; 54: 433-447. doi: 10.1093/pcp/pct022
- 778 43. Paquis S, Mazeyratgourbeyre F, Fernandez O, Crouzet J, Clement C, Baillieul F, et al.  
779 Characterization of a F-box gene up-regulated by phytohormones and upon biotic and abiotic  
780 stresses in grapevine. *Mol Biol Rep.* 2011; 38: 3327-3337. doi: 10.1007/s11033-010-0438-y
- 781 44. Thiel H, Hleibieh K, Gilmer D, Varrelmann M. The P25 pathogenicity factor of Beet necrotic  
782 yellow vein virus targets the sugar beet 26S proteasome involved in the induction of a  
783 hypersensitive resistance response via interaction with an F-box protein. *Mol Plant Microbe In.*  
784 2012; 25: 1058-1072. doi: 10.1094/MPMI-03-12-0057-R
- 785 45. Ullah F, Xu Q, Zhao Y, Zhou DX. Histone deacetylase HDA710 controls salt tolerance by  
786 regulating ABA signaling in rice. *J Integr Plant Biol.* 2020. doi:10.1111/jipb.13042. Epub ahead  
787 of print. PMID: 33289304

- 788 46. Wätzlich D, Vetter I, Gotthardt K, Miertzschke M, Chen YX, Wittinghofer A, et al. The interplay  
789 between RPGR, PDE $\delta$  and Arl2/3 regulate the ciliary targeting of farnesylated cargo. *EMBO Rep.*  
790 2013; 14: 465-472. doi: 10.1038/embor.2013.37
- 791 47. Guan C, Li X, Tian DY, Liu HY, Cen HF, Tadege M, et al. ADP-ribosylation factors improve  
792 biomass yield and salinity tolerance in transgenic switchgrass (*Panicum virgatum* L.). *Plant Cell*  
793 *Rep.* 2020; 39: 1623–1638. doi: 10.1007/s00299-020-02589-x
- 794 48. Li YQ, Song JH, Zhu G, Hou ZH, Wang L, Wu XX, et al. Genome-wide identification and  
795 expression analysis of ADP-ribosylation factors associated with biotic and abiotic stress in wheat  
796 (*Triticum aestivum* L.). *PeerJ.* 2021. doi: 10.7717/peerj.10963
- 797 49. Schiavon CR, Turn RE, Newman LE, Kahn RA. ELMOD2 regulates mitochondrial fusion in a  
798 mitofusin-dependent manner, downstream of ARL2. *Mol Biol Cell.* 2019; 30: 1198-1213. doi:  
799 10.1091/mbc.E18-12-0804
- 800 50. Dixon RA, Paiva NL. Stress-induced phenylpropanoid metabolism. *Plant Cell.* 1995; 7: 1085. doi:  
801 1085.10.1105/tpc.7.7.1085
- 802 51. Yang LY, Han R. Effects of Ca<sup>2+</sup> on wheat germination and seeding development under saline  
803 stress. *Chinese Bulletin of Botany.* 2011; 46: 155-161. doi: 10.3724/SP.J.1259.2011.00155
- 804 52. Tantray AY, Bashir SS, Ahmad A Low nitrogen stress regulates chlorophyll fluorescence in  
805 coordination with photosynthesis and Rubisco efficiency of rice. *Physiol Mol Biol Pla.* 2020; 26:  
806 83-94. doi: 10.1007/s12298-019-00721-0
- 807 53. Munné BS, Shikanai T, Asada K. Enhanced ferredoxin-dependent cyclic electron flow around  
808 photosystem I and  $\alpha$ -tocopherolquinone accumulation in water-stressed *ndhB*-inactivated tobacco  
809 mutants. *Planta.* 2005; 222: 502-511. doi: 10.1007/s00425-005-1548-y

810 54. Floor SN, Doudna JA. Get in LINE: Competition for newly minted retrotransposon proteins at the  
811 ribosome. *Mol Cell*. 2015; 60: 712-714. doi: 10.1016/j.molcel.2015.11.014

## 812 **Supporting information**

813 **S1 Fig. Classification of FBK proteins in wheat based on different functional domains.** F-box, the  
814 protein with F-box domain; Kelch, F-box protein having Kelch domain; PAS, FBK protein with PAS  
815 domain that was named after three proteins that it occurs in: Per-period circadian protein, Arnt-Ah  
816 receptor nuclear translocator protein and Sim-single-minded protein; PAC, FBK protein with PAC  
817 domain that usually appears at the C-terminus of the PAS motif.

818 **S2 Fig. WebLogo generated by alignments of the F-box (A) or Kelch (B) domains of wheat FBKs.**

819 The F-box or Kelch motifs were retrieved from 74 wheat F-box proteins. The overall height of every  
820 stack is indicative of sequence conservation at the given position within the motif, whereas the height  
821 of the letters within each stack is indicative of the relative frequency of the corresponding amino acid.  
822 The bit score represents the information content for each position. Asterisks mark the conserved  
823 residues.

824 **S3 Fig. Chromosomal distribution of wheat FBK genes.** The chromosomes were drafted to  
825 proportion and the chromosome numbers were indicated at the top of each stave. Chromosomal  
826 distances were given in megabases (10 Mb). The gene names were listed at the right side of each  
827 chromosome corresponding to the position of each gene. Tandemly duplicated genes were shown in  
828 colored boxes. Segmental duplications were shown in coloured blocks.

829 **S1 Table. Primer sequences.**

830 **S2 Table. Characteristics of wheat, Arabidopsis, rice, sorghum and maize FBK proteins.**

831 **S3 Table. FPKM values of wheat FBK genes.**

832 **S4 Table. Screening of the candidate proteins interacting with TaAFR.**

833 **S5 Table. Bioinformatics analysis of the candidate proteins.**

834 **S1 File. Sequences of FBK proteins in wheat, Arabidopsis, rice, sorghum and maize.**



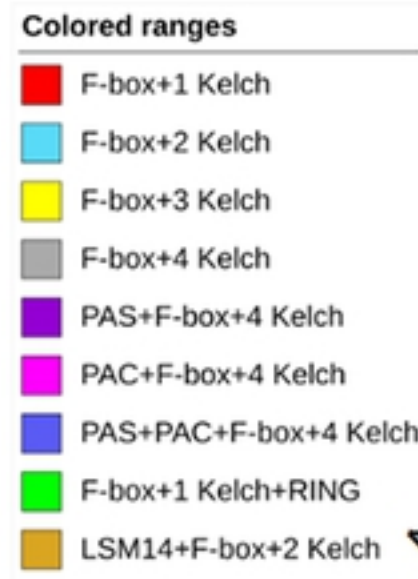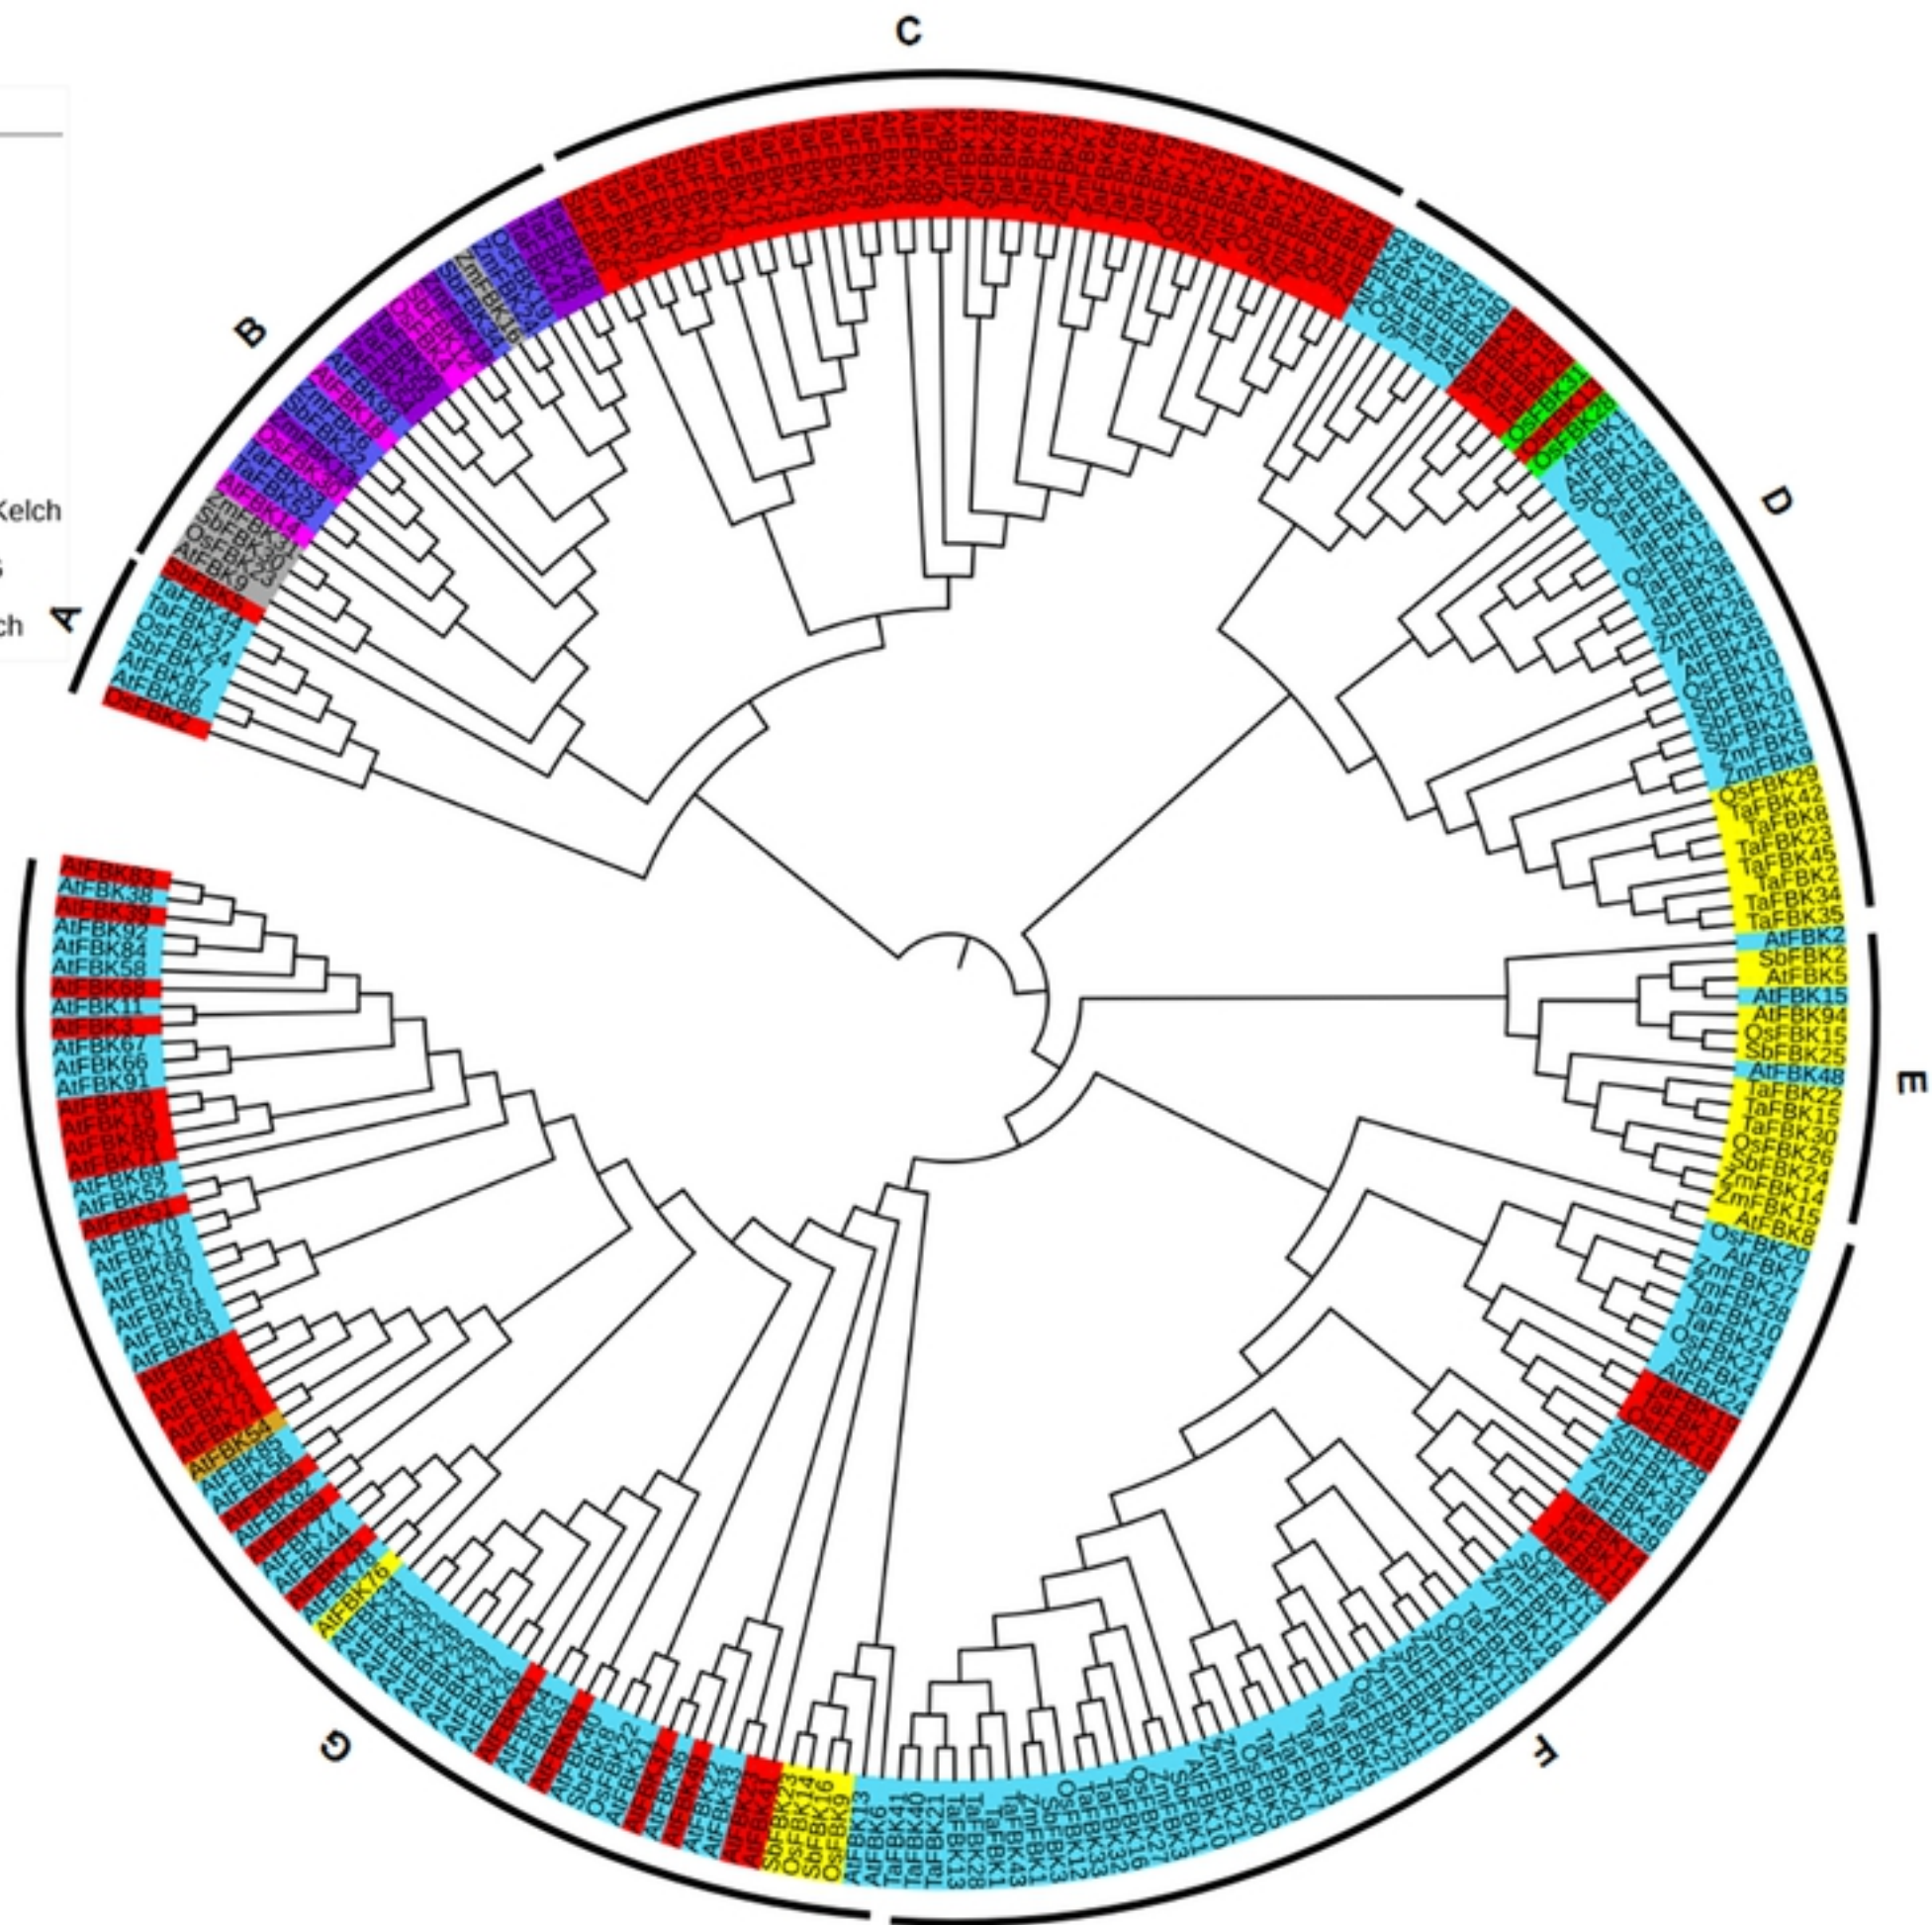

Fig 1. Phylogenetic analysis of FBK proteins in wheat, Arabidopsis

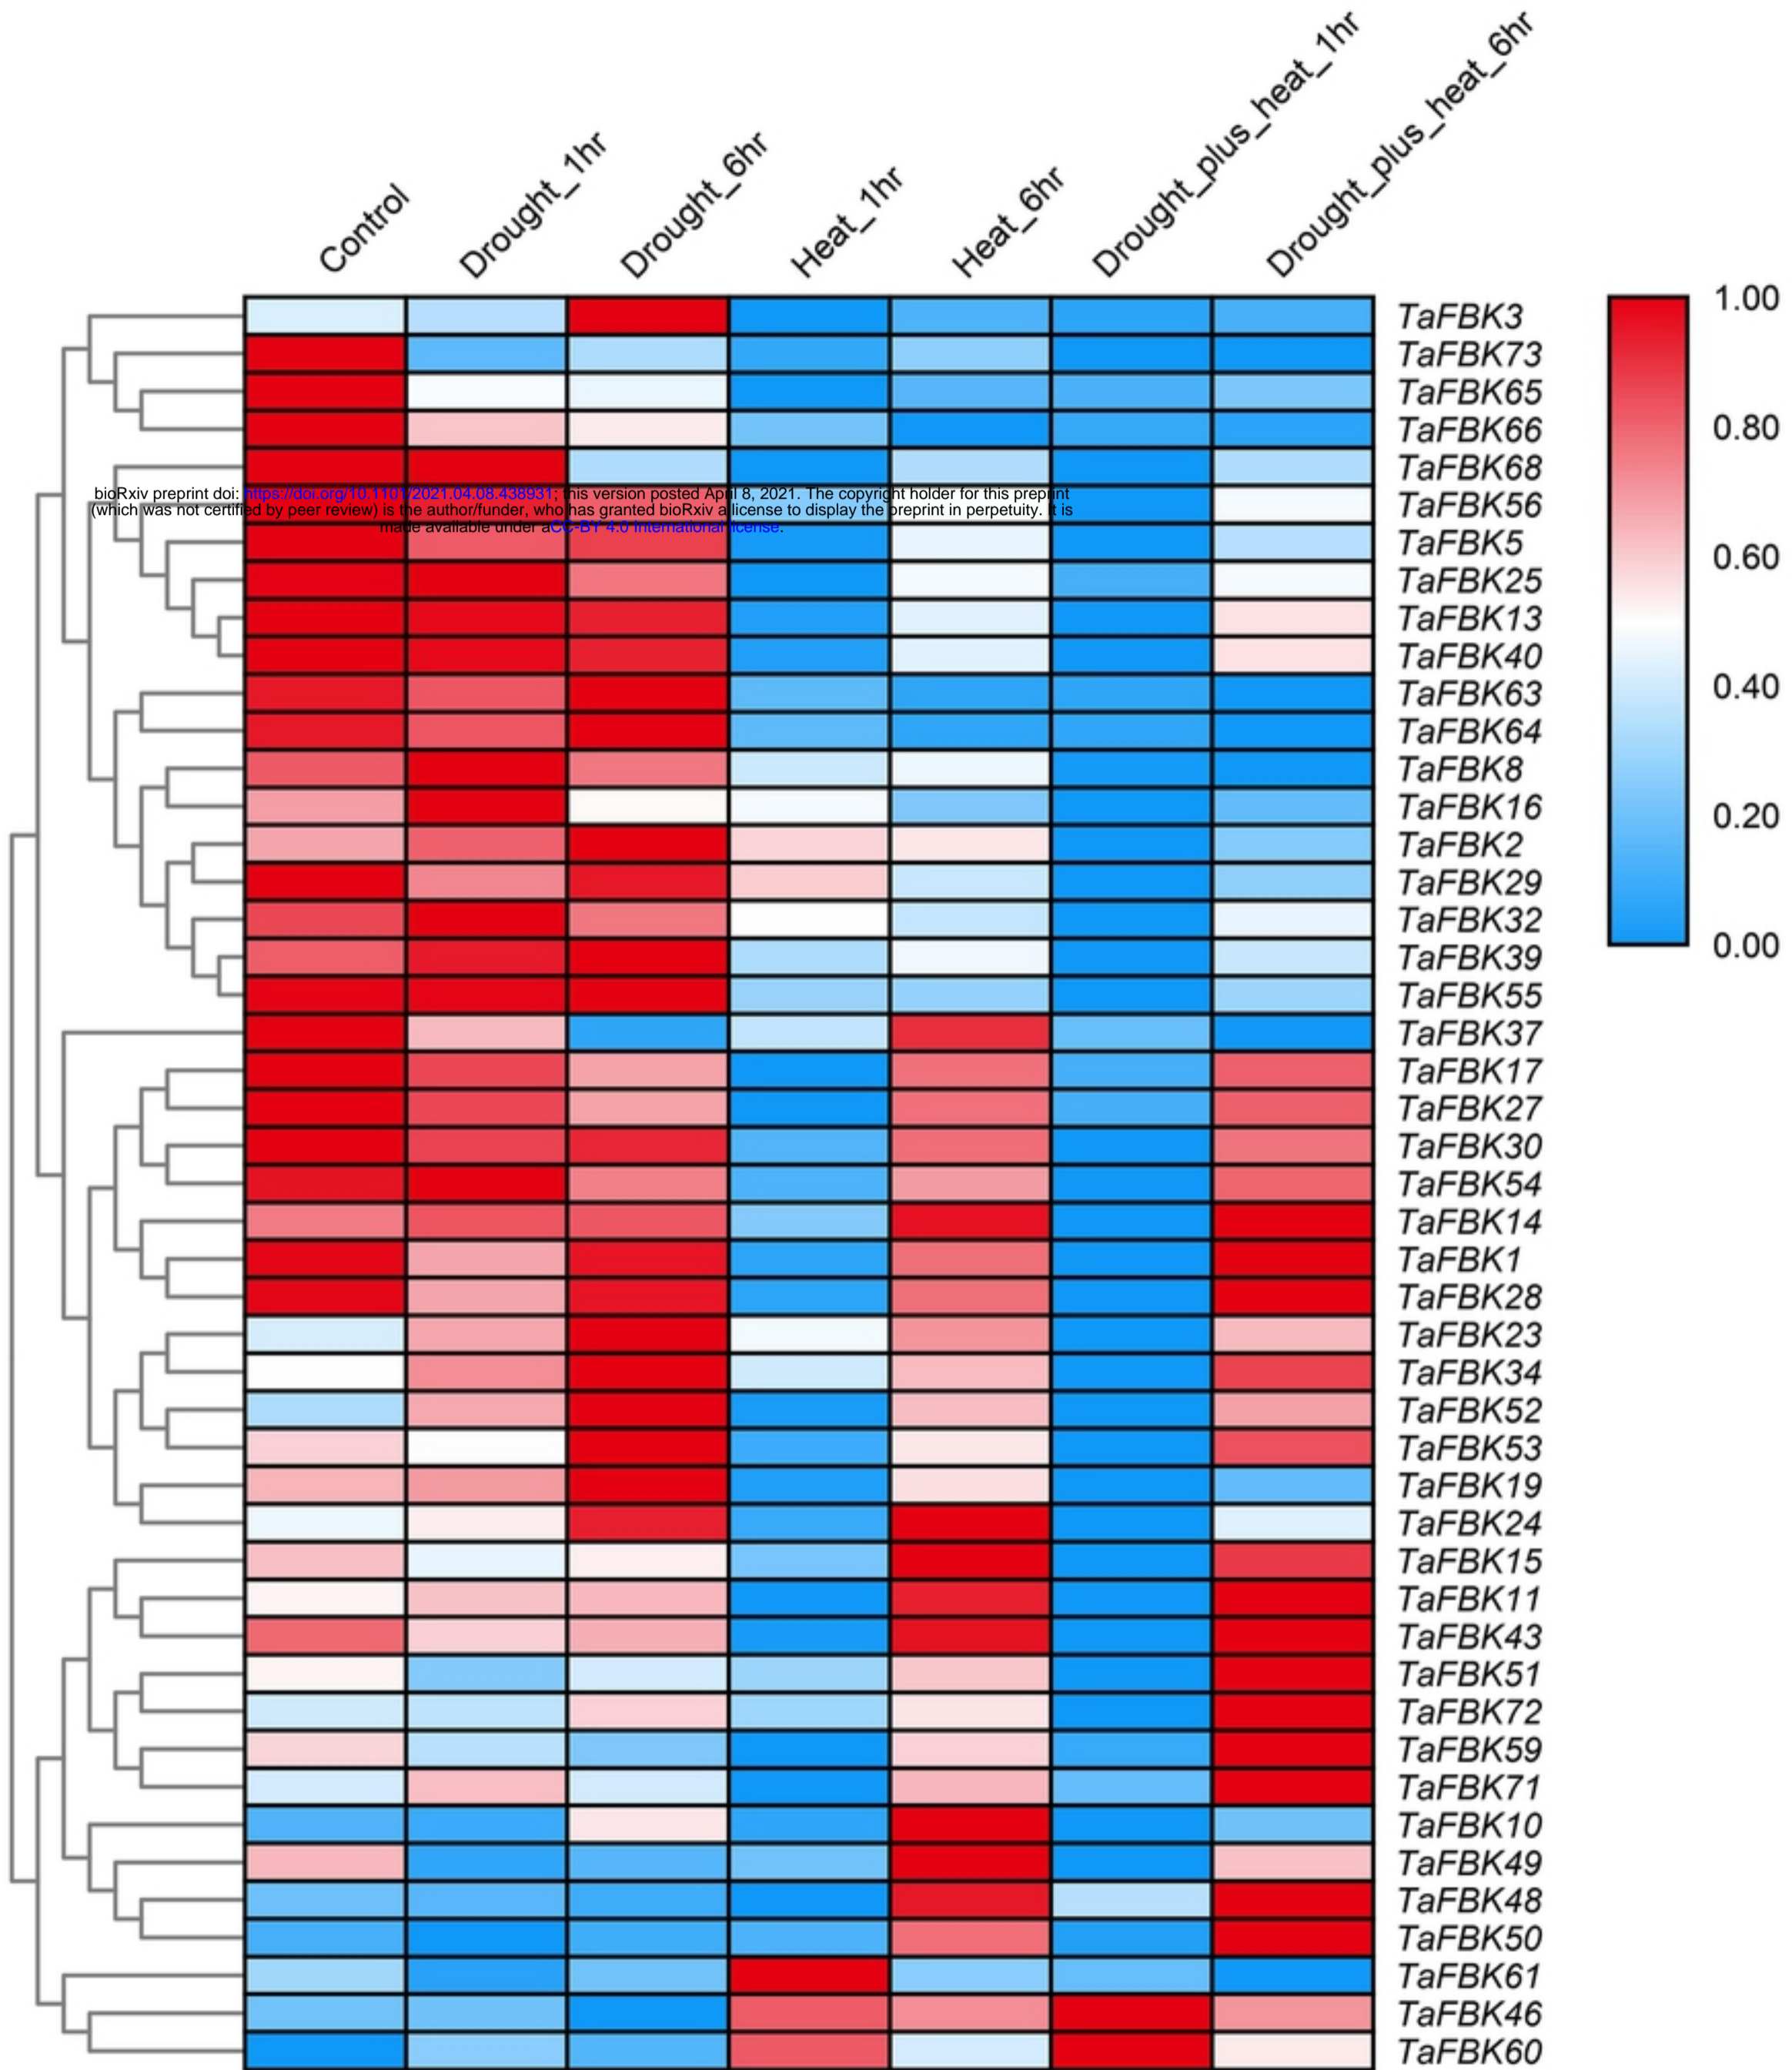

Fig 3. Heat map showing digital expression profiles of FBK genes

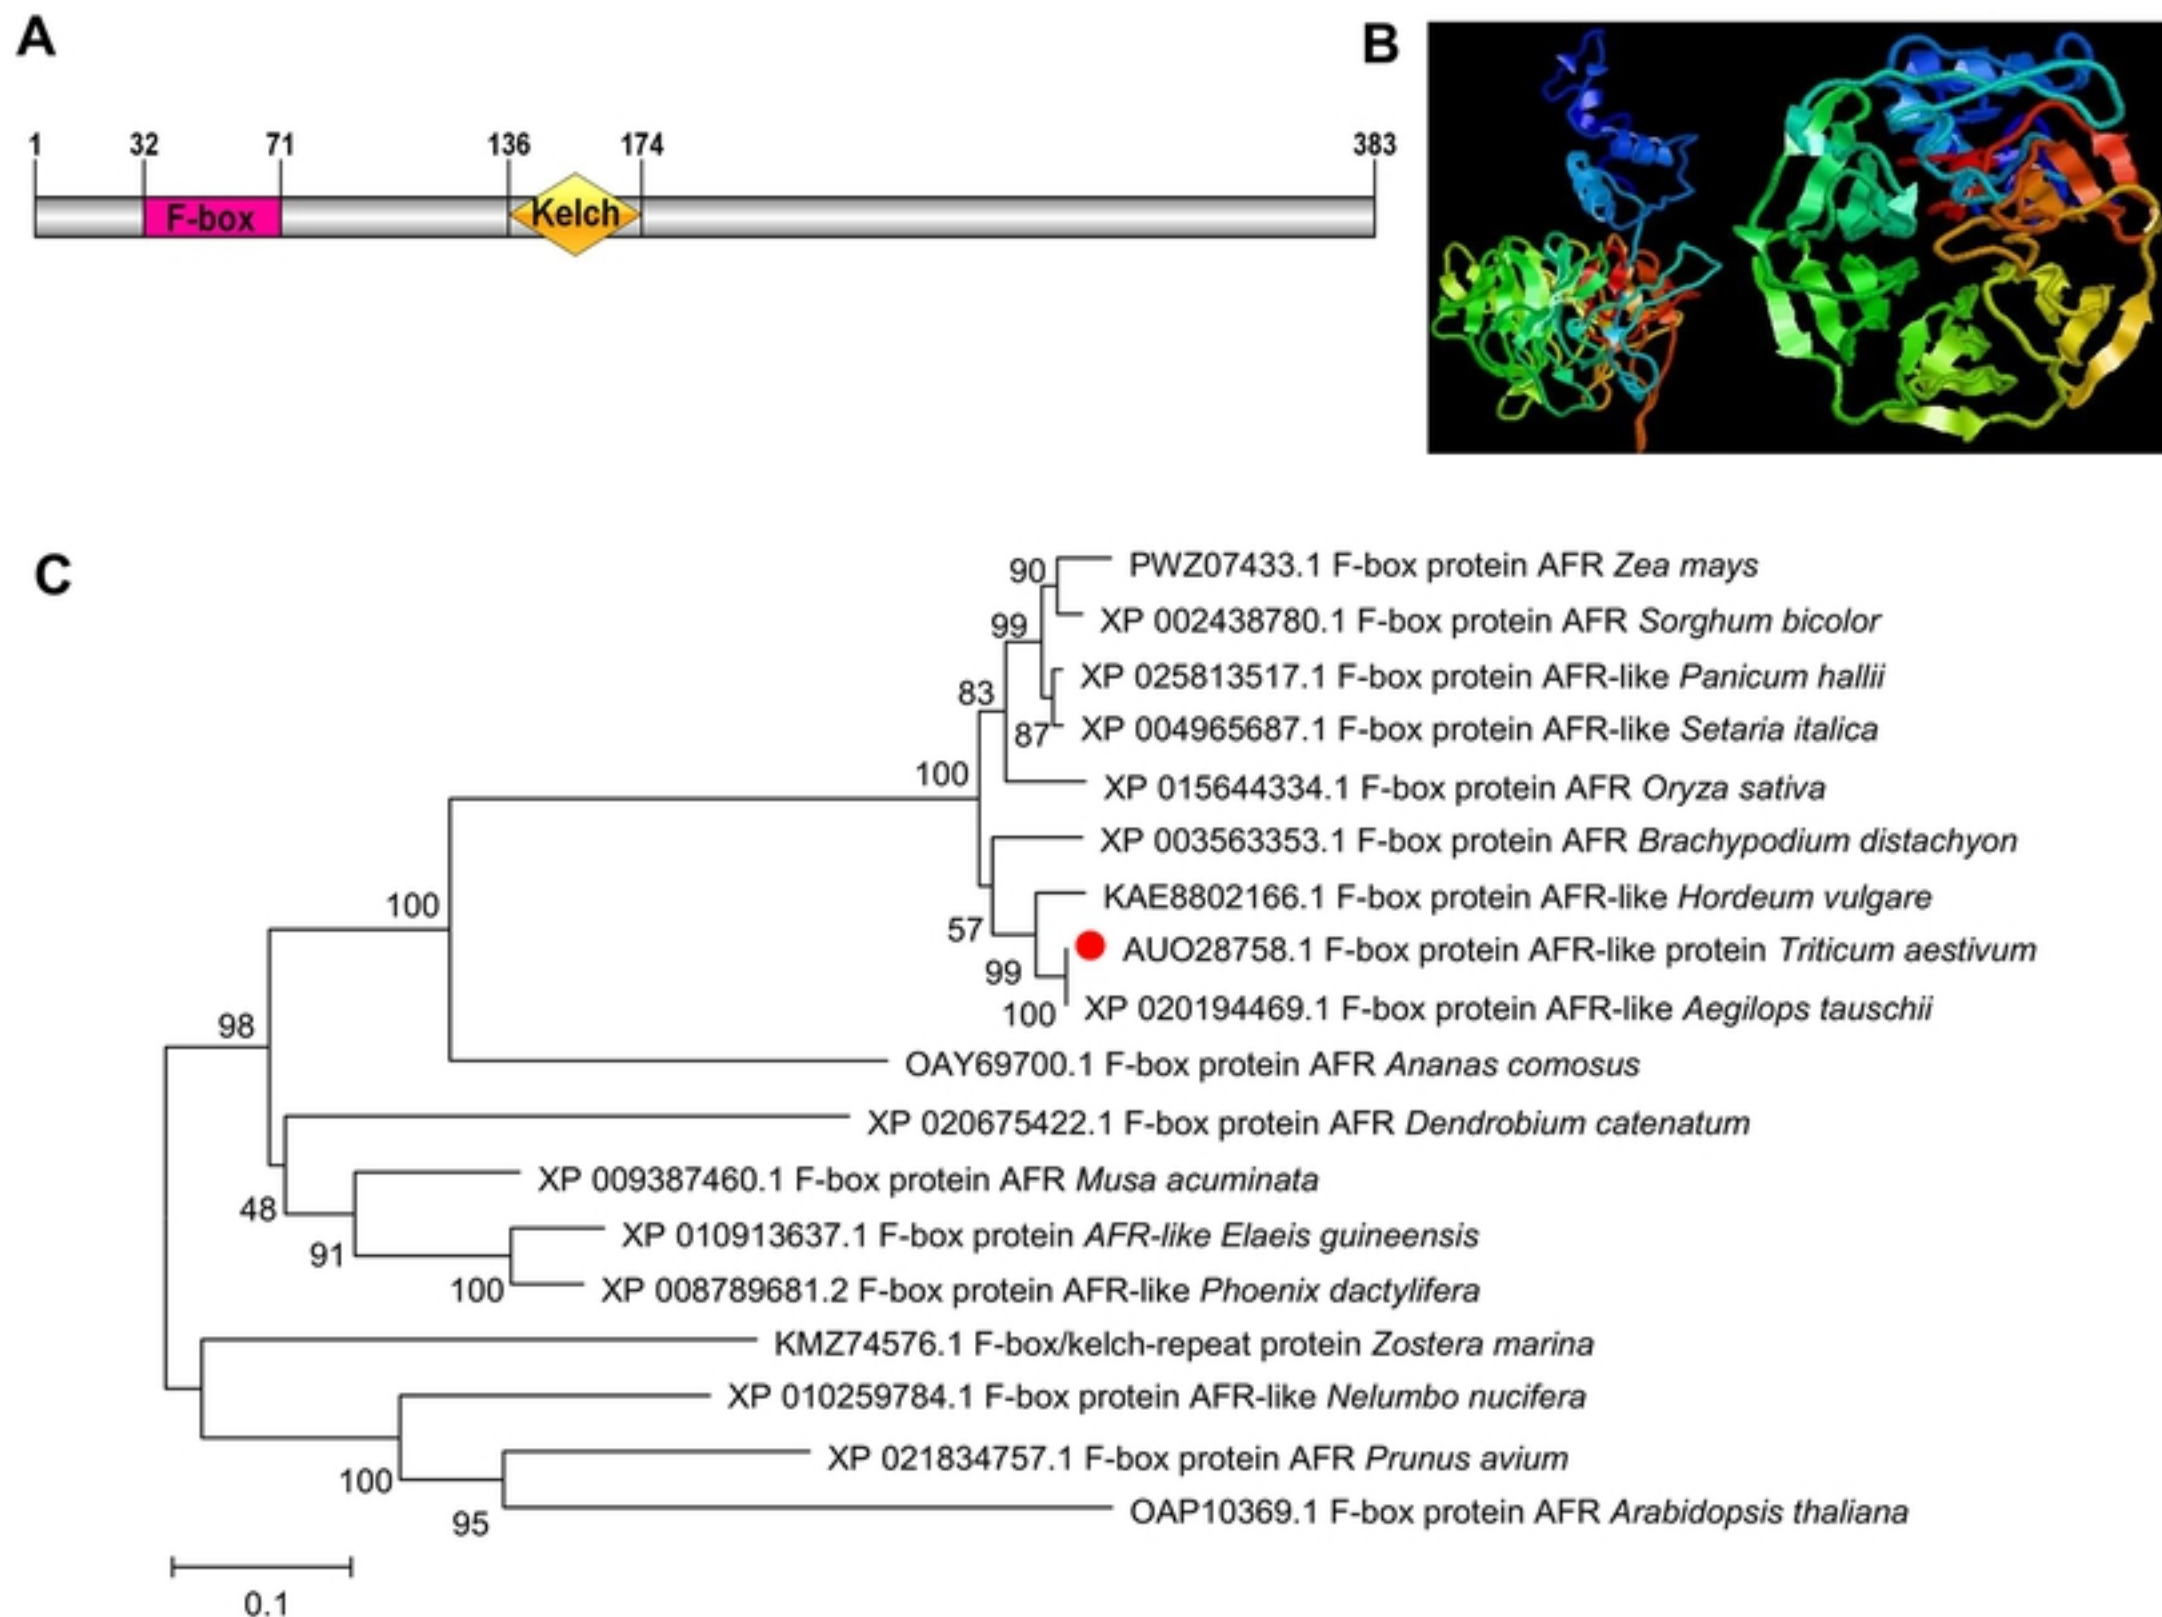

Fig 4. Sequence characteristics of wheat TaAFR.

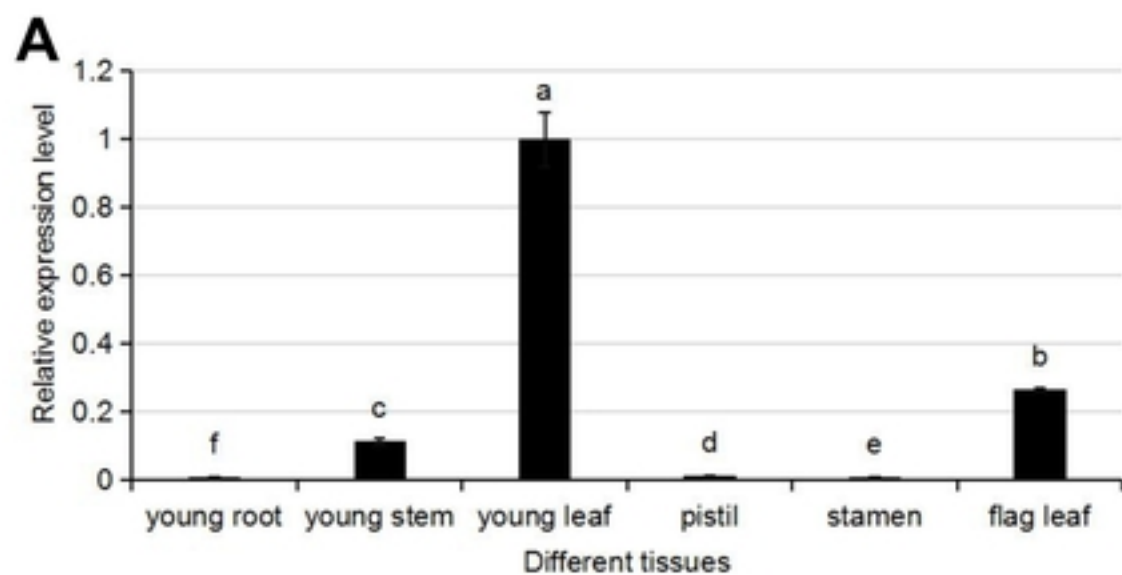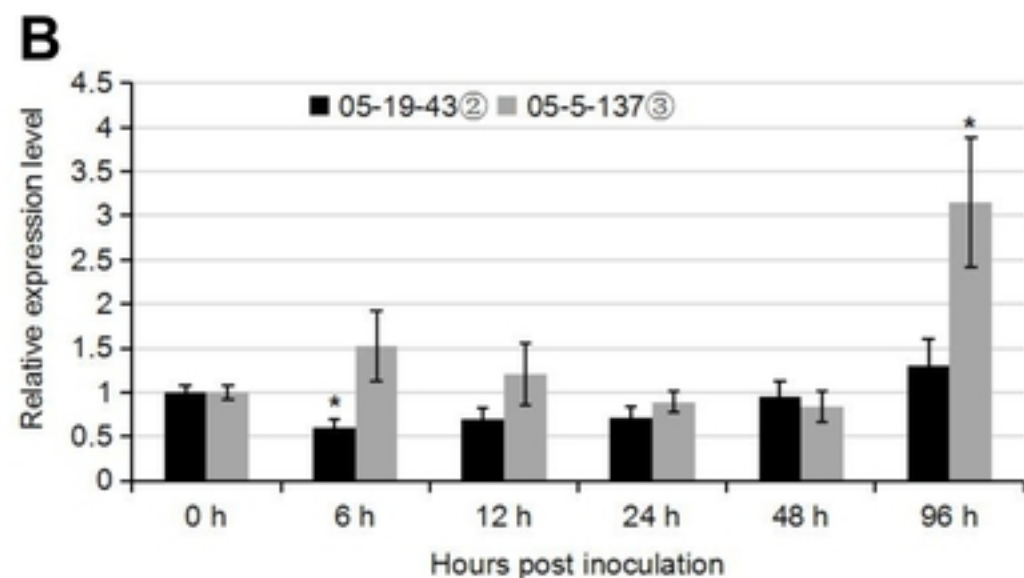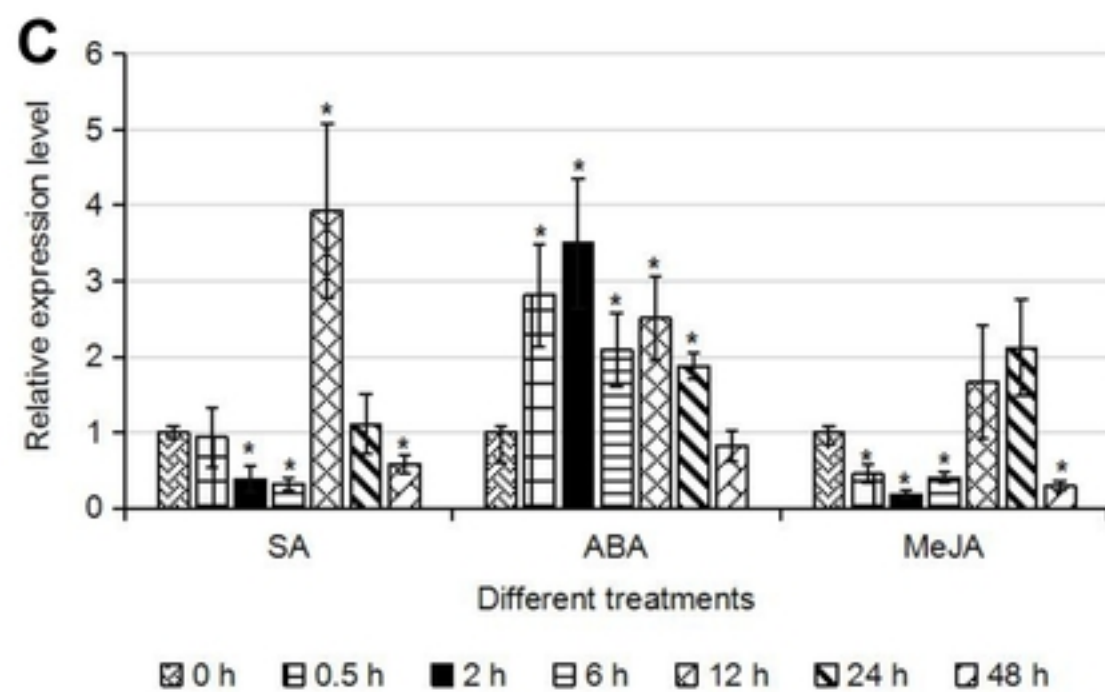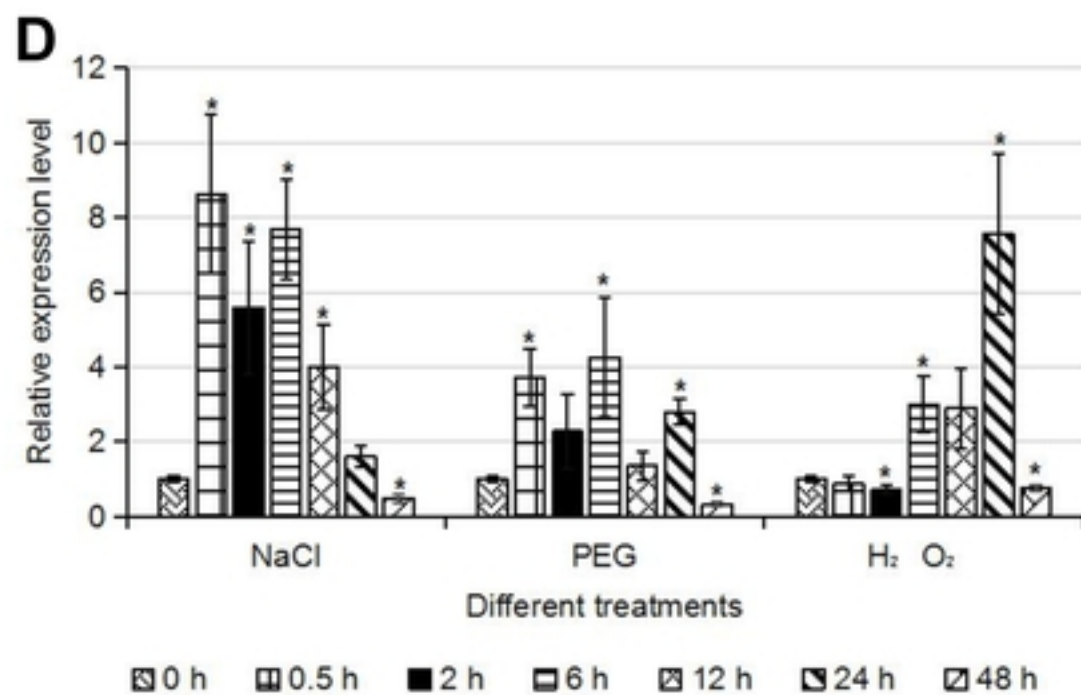

Fig 5. The expression patterns of TaAFR in different wheat tissue

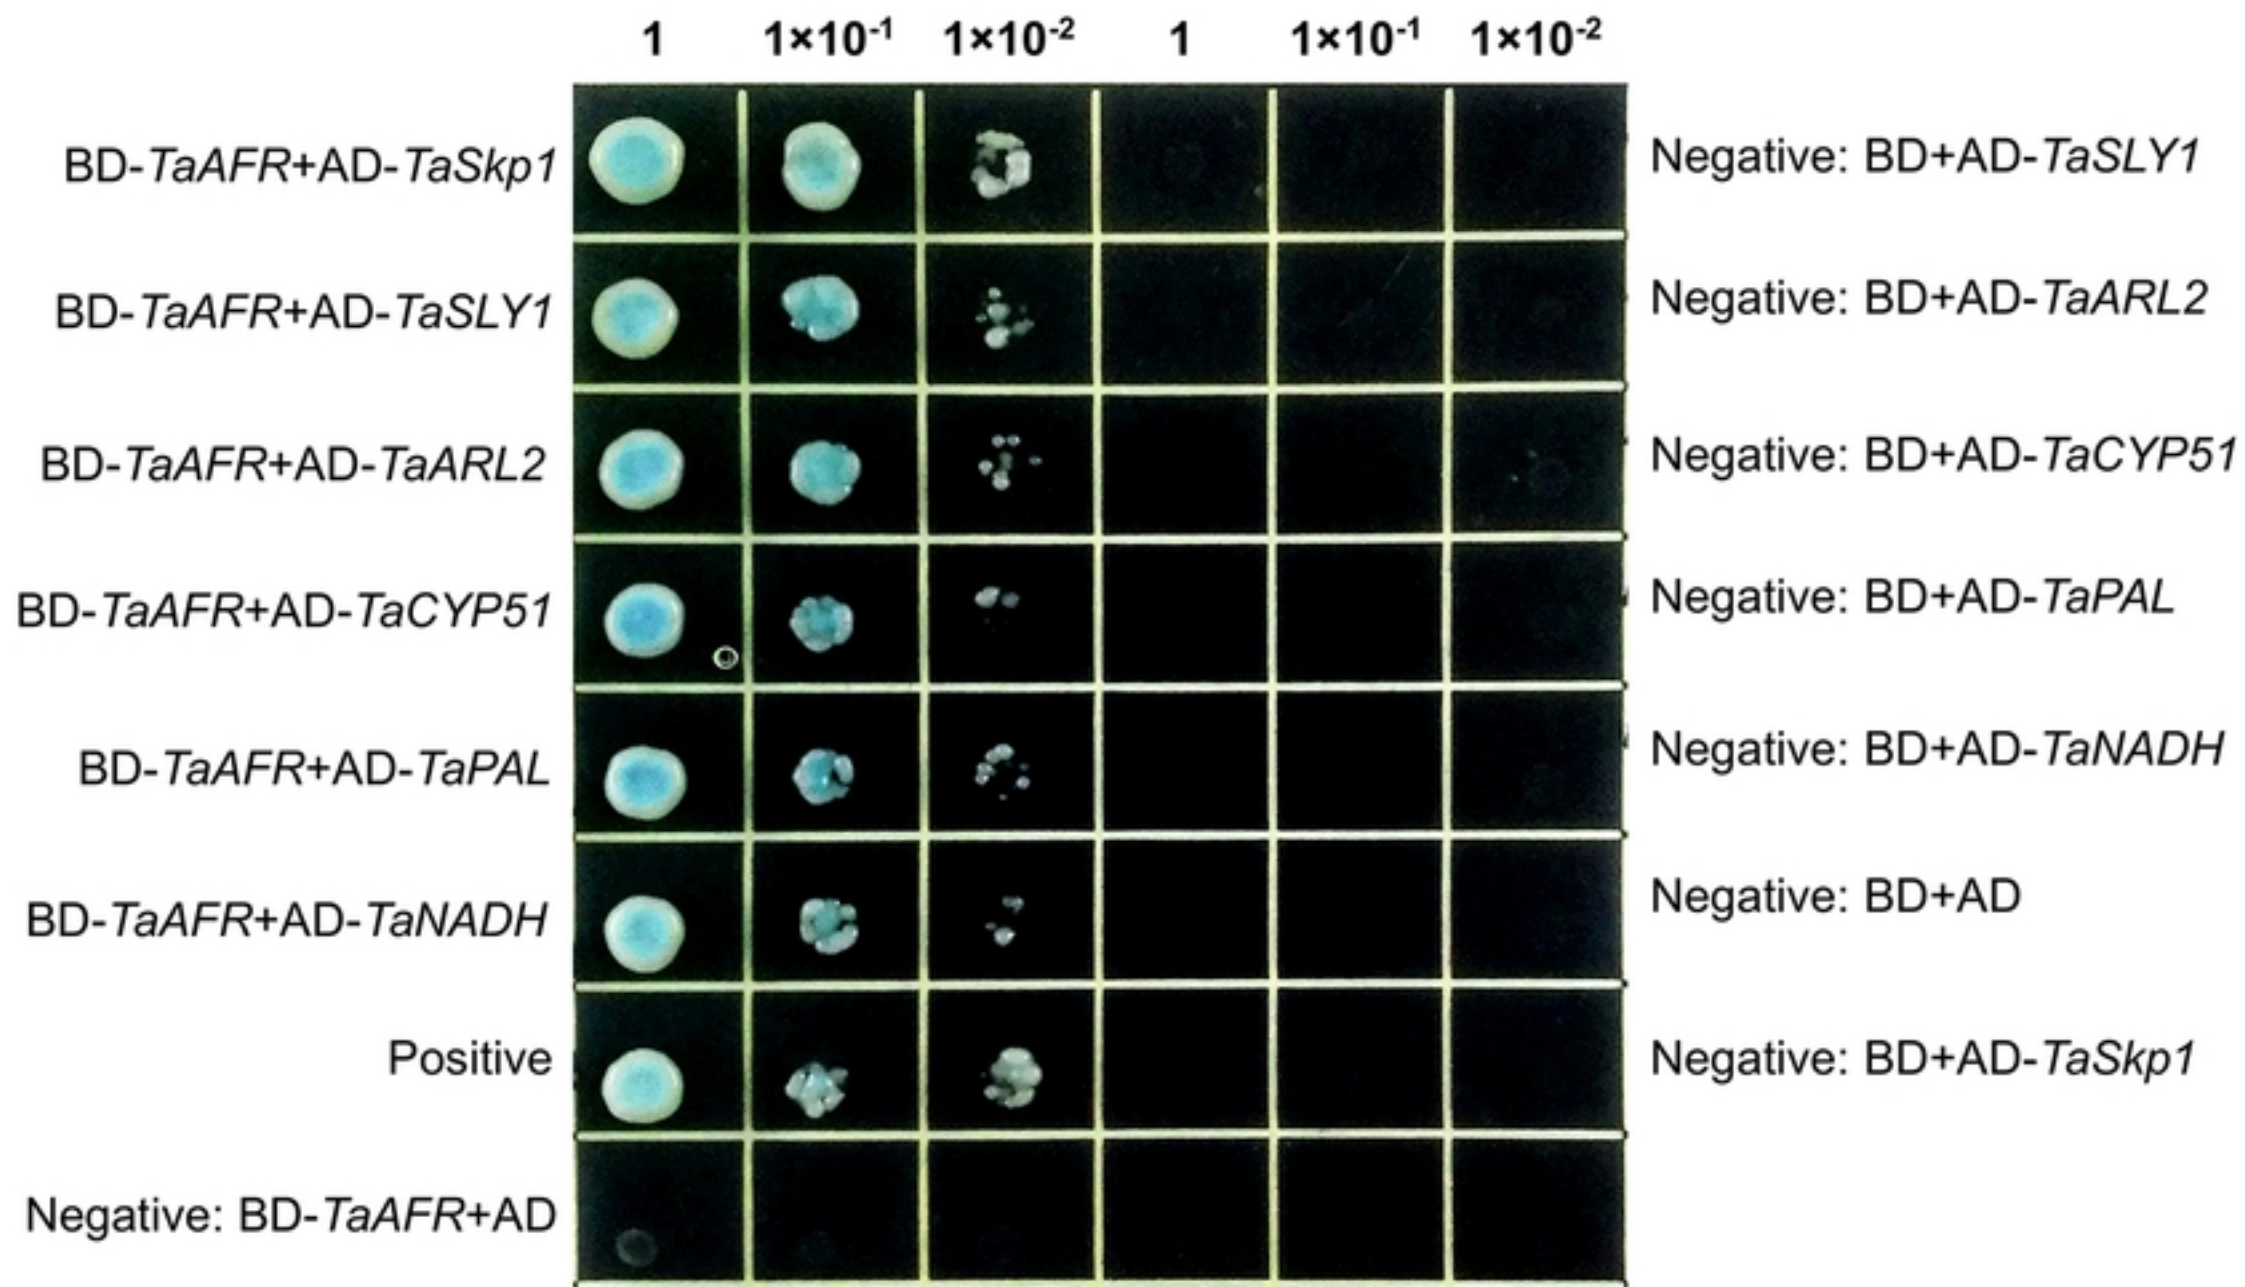

Fig 7. Protein interactions tested by Y2H.

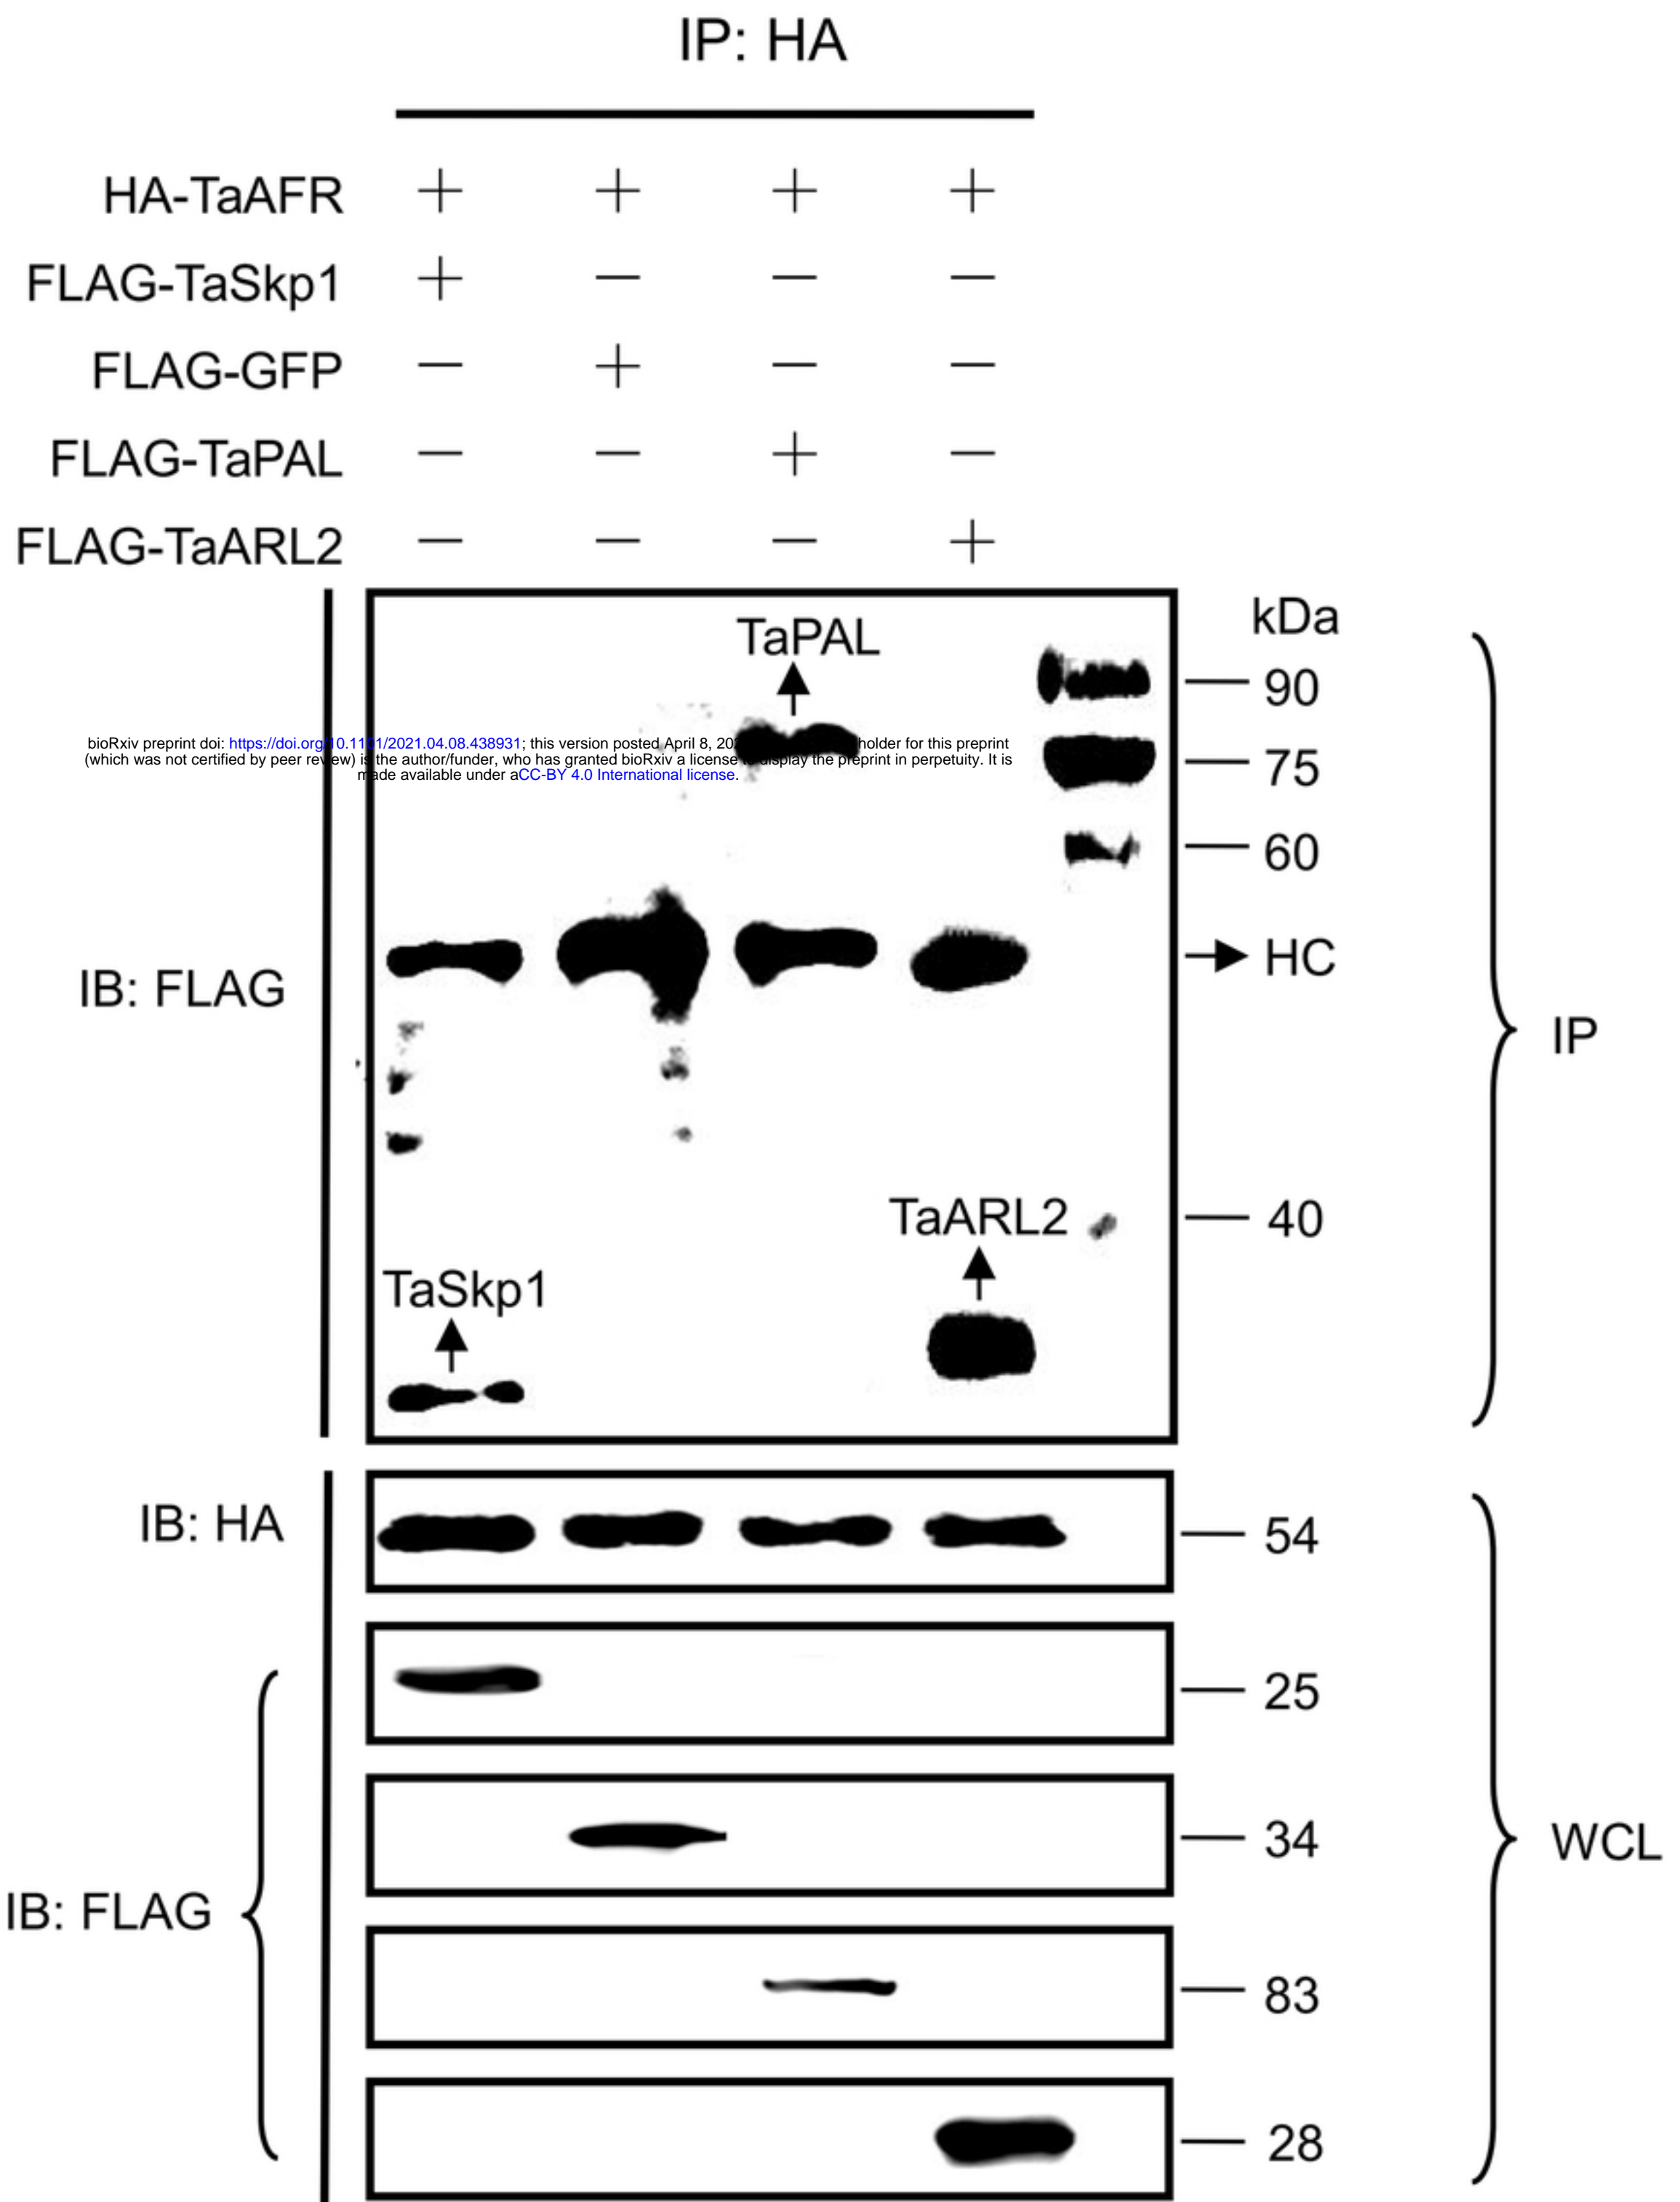

Fig 9. Verification of protein interactions by Co-IP.

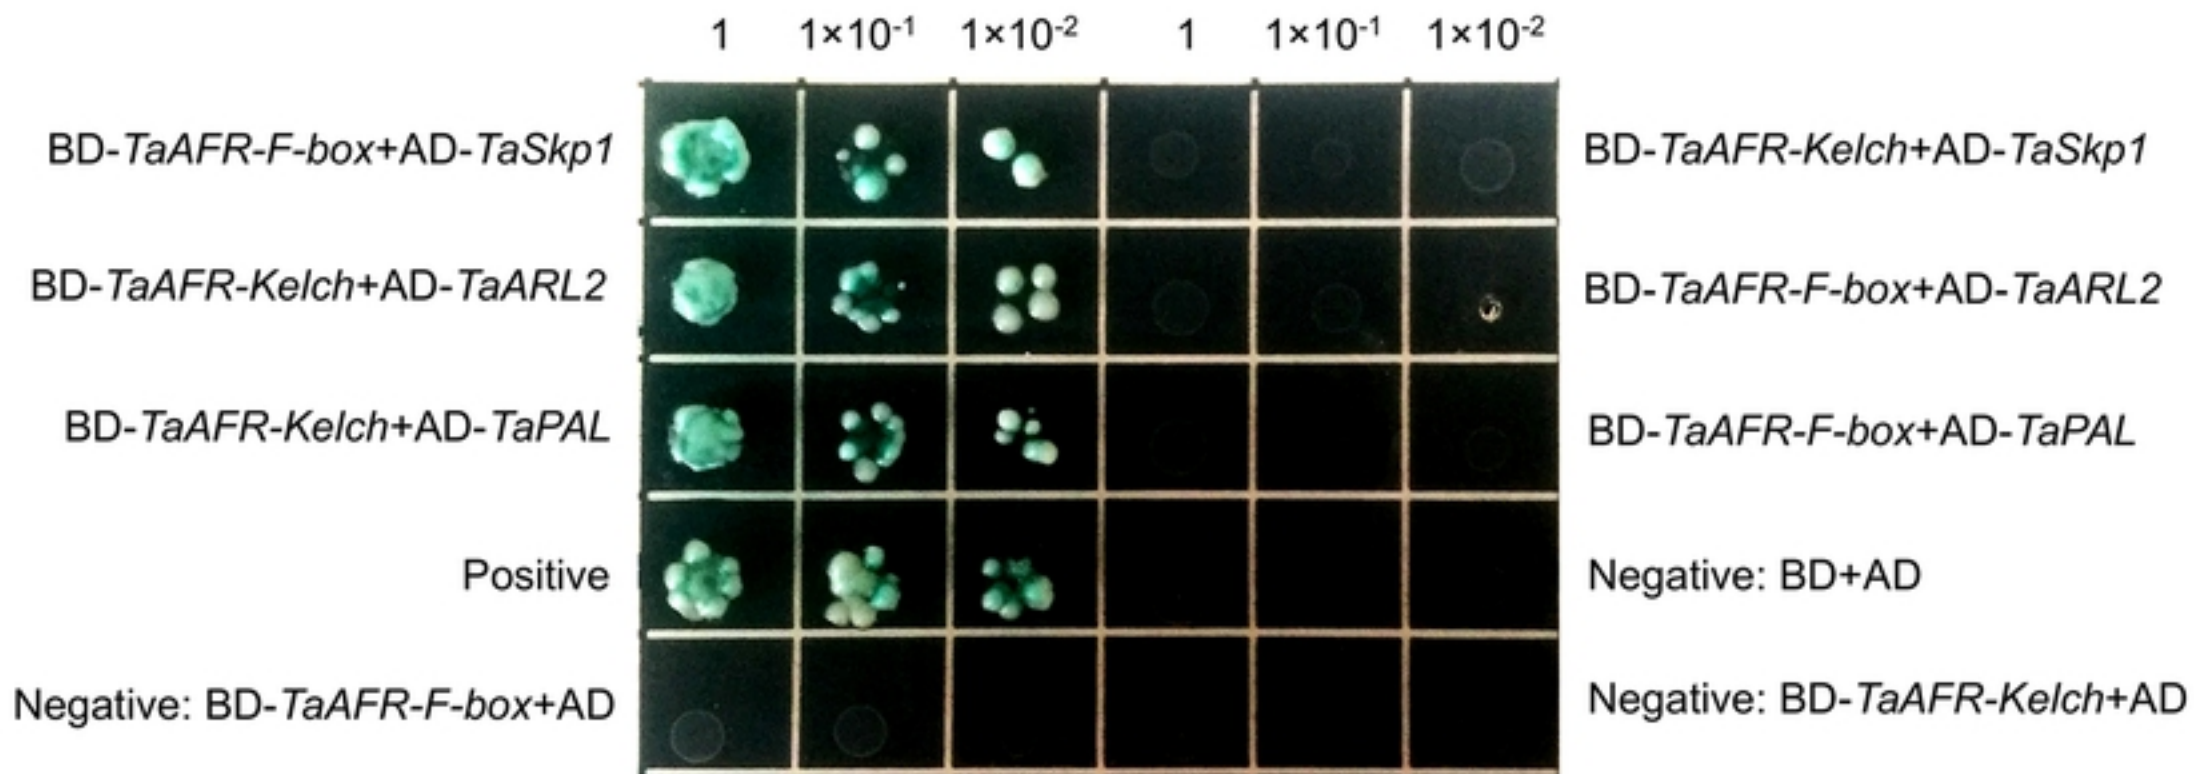

Fig 10. Domain interactions tested by Y2H.

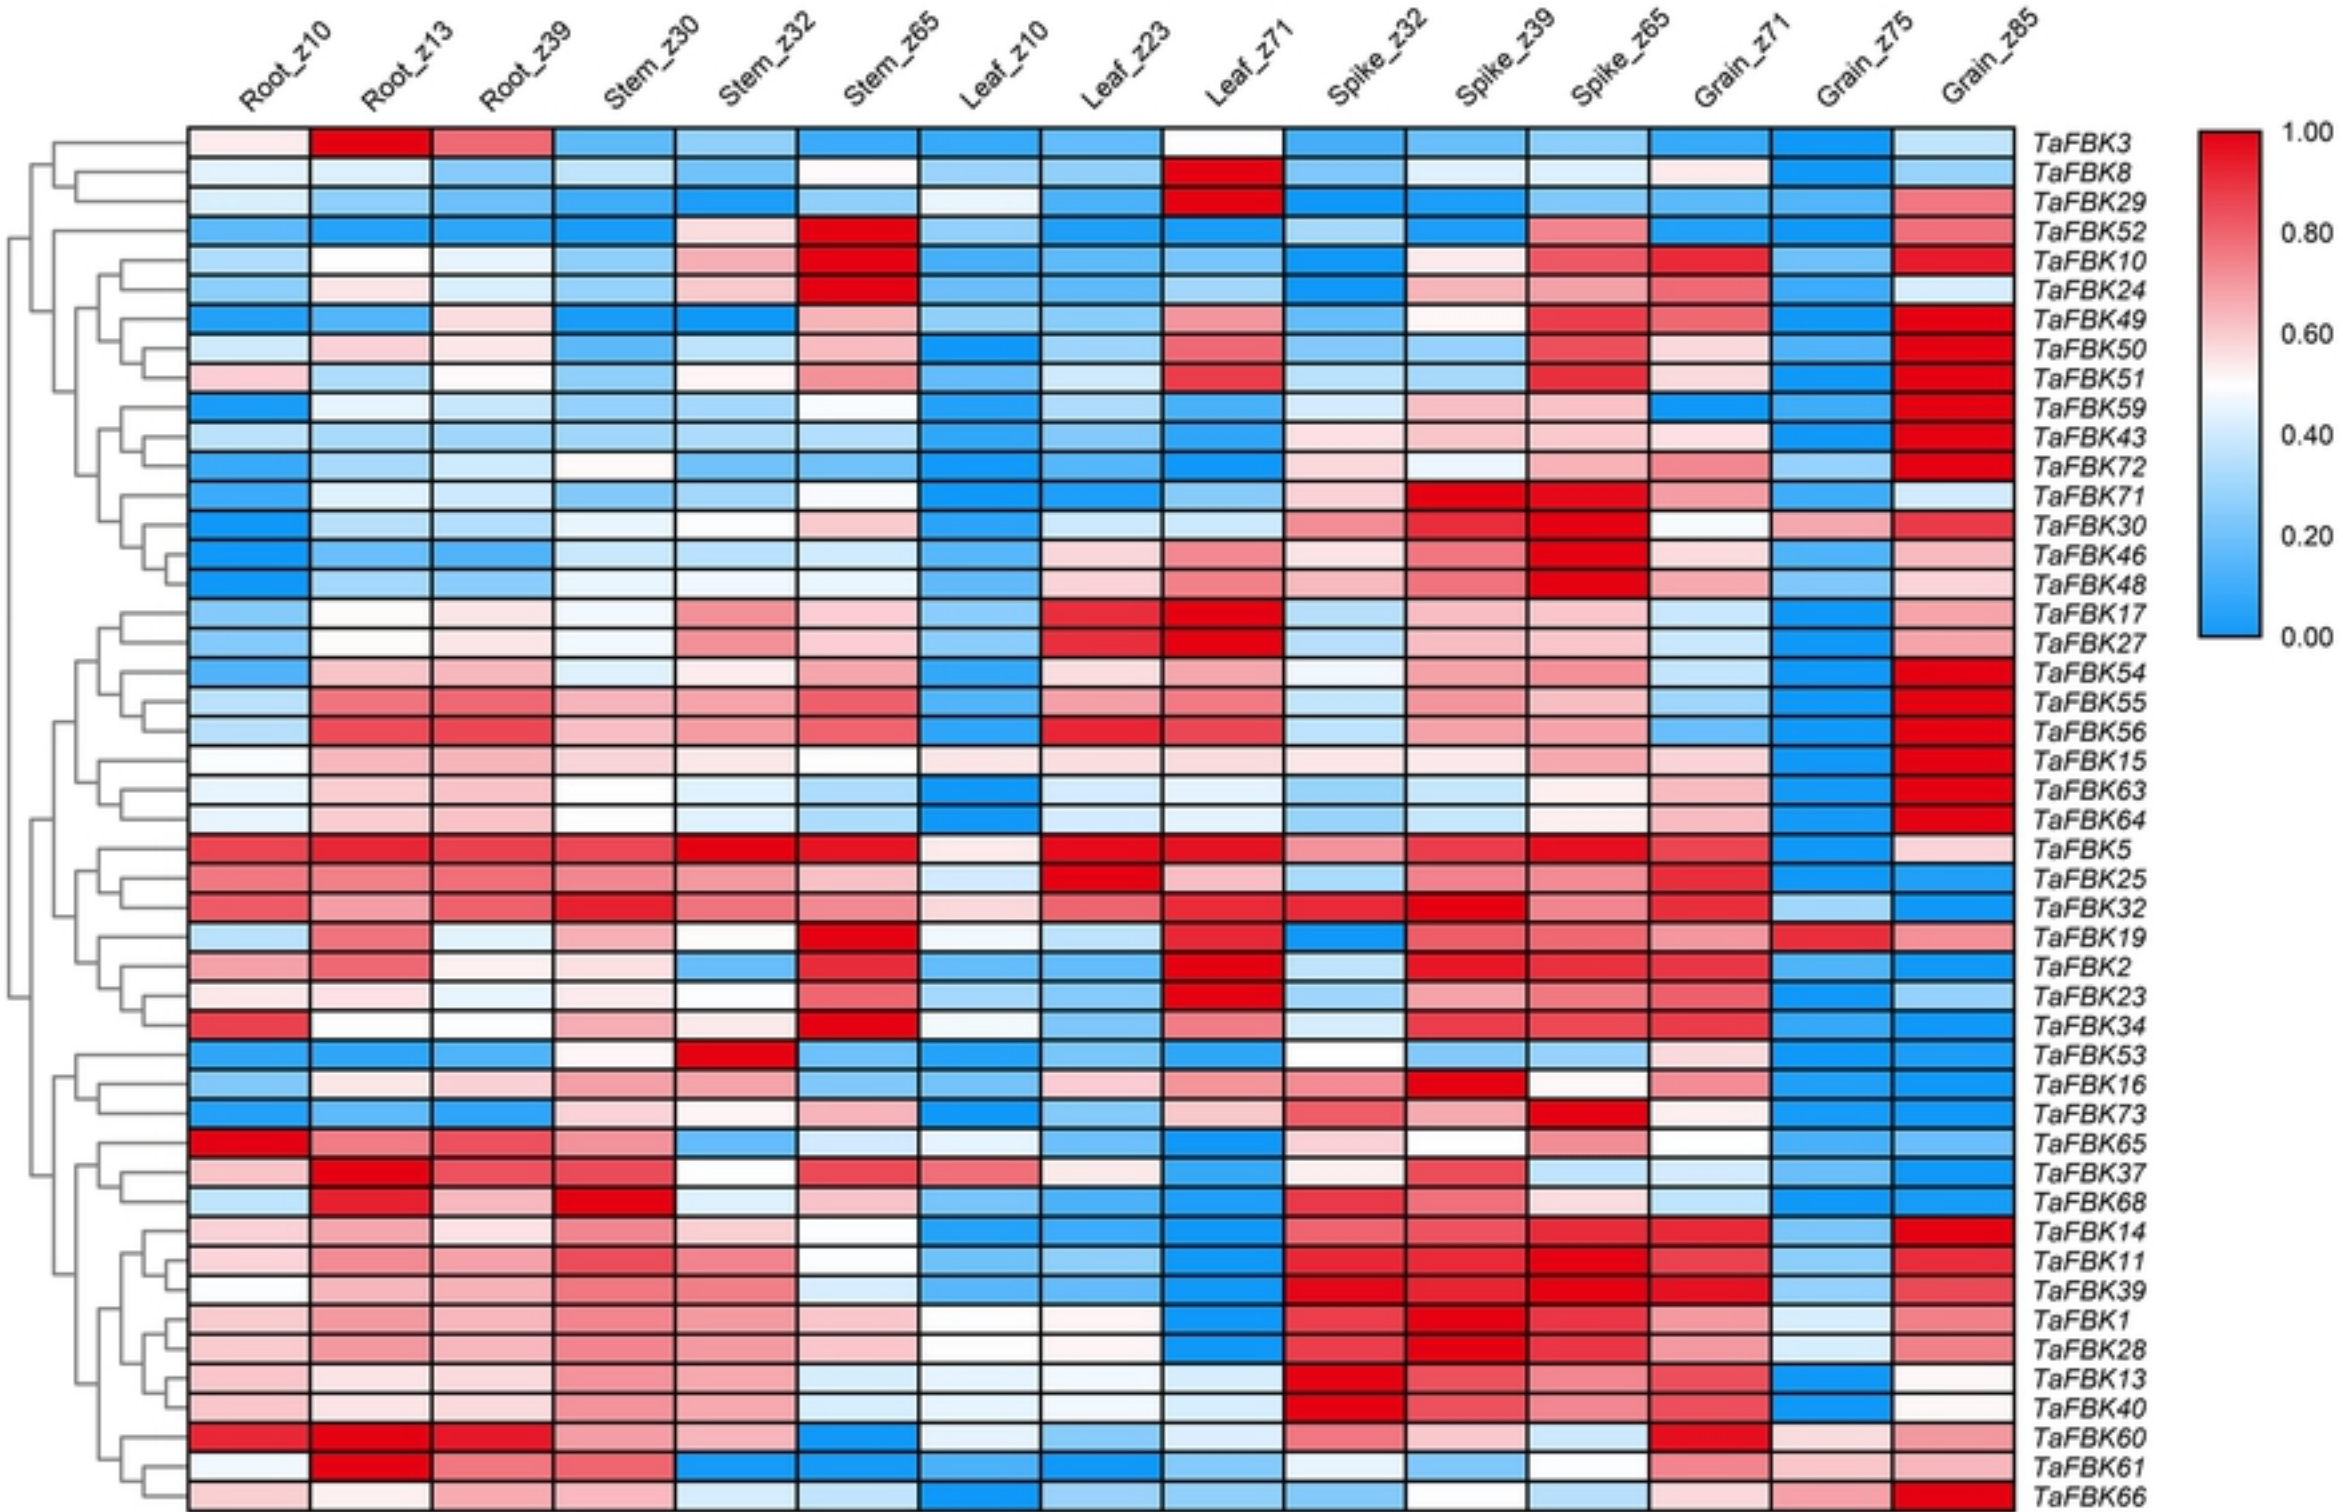

Fig 2. Heat map showing digital expression profiles of FBK genes



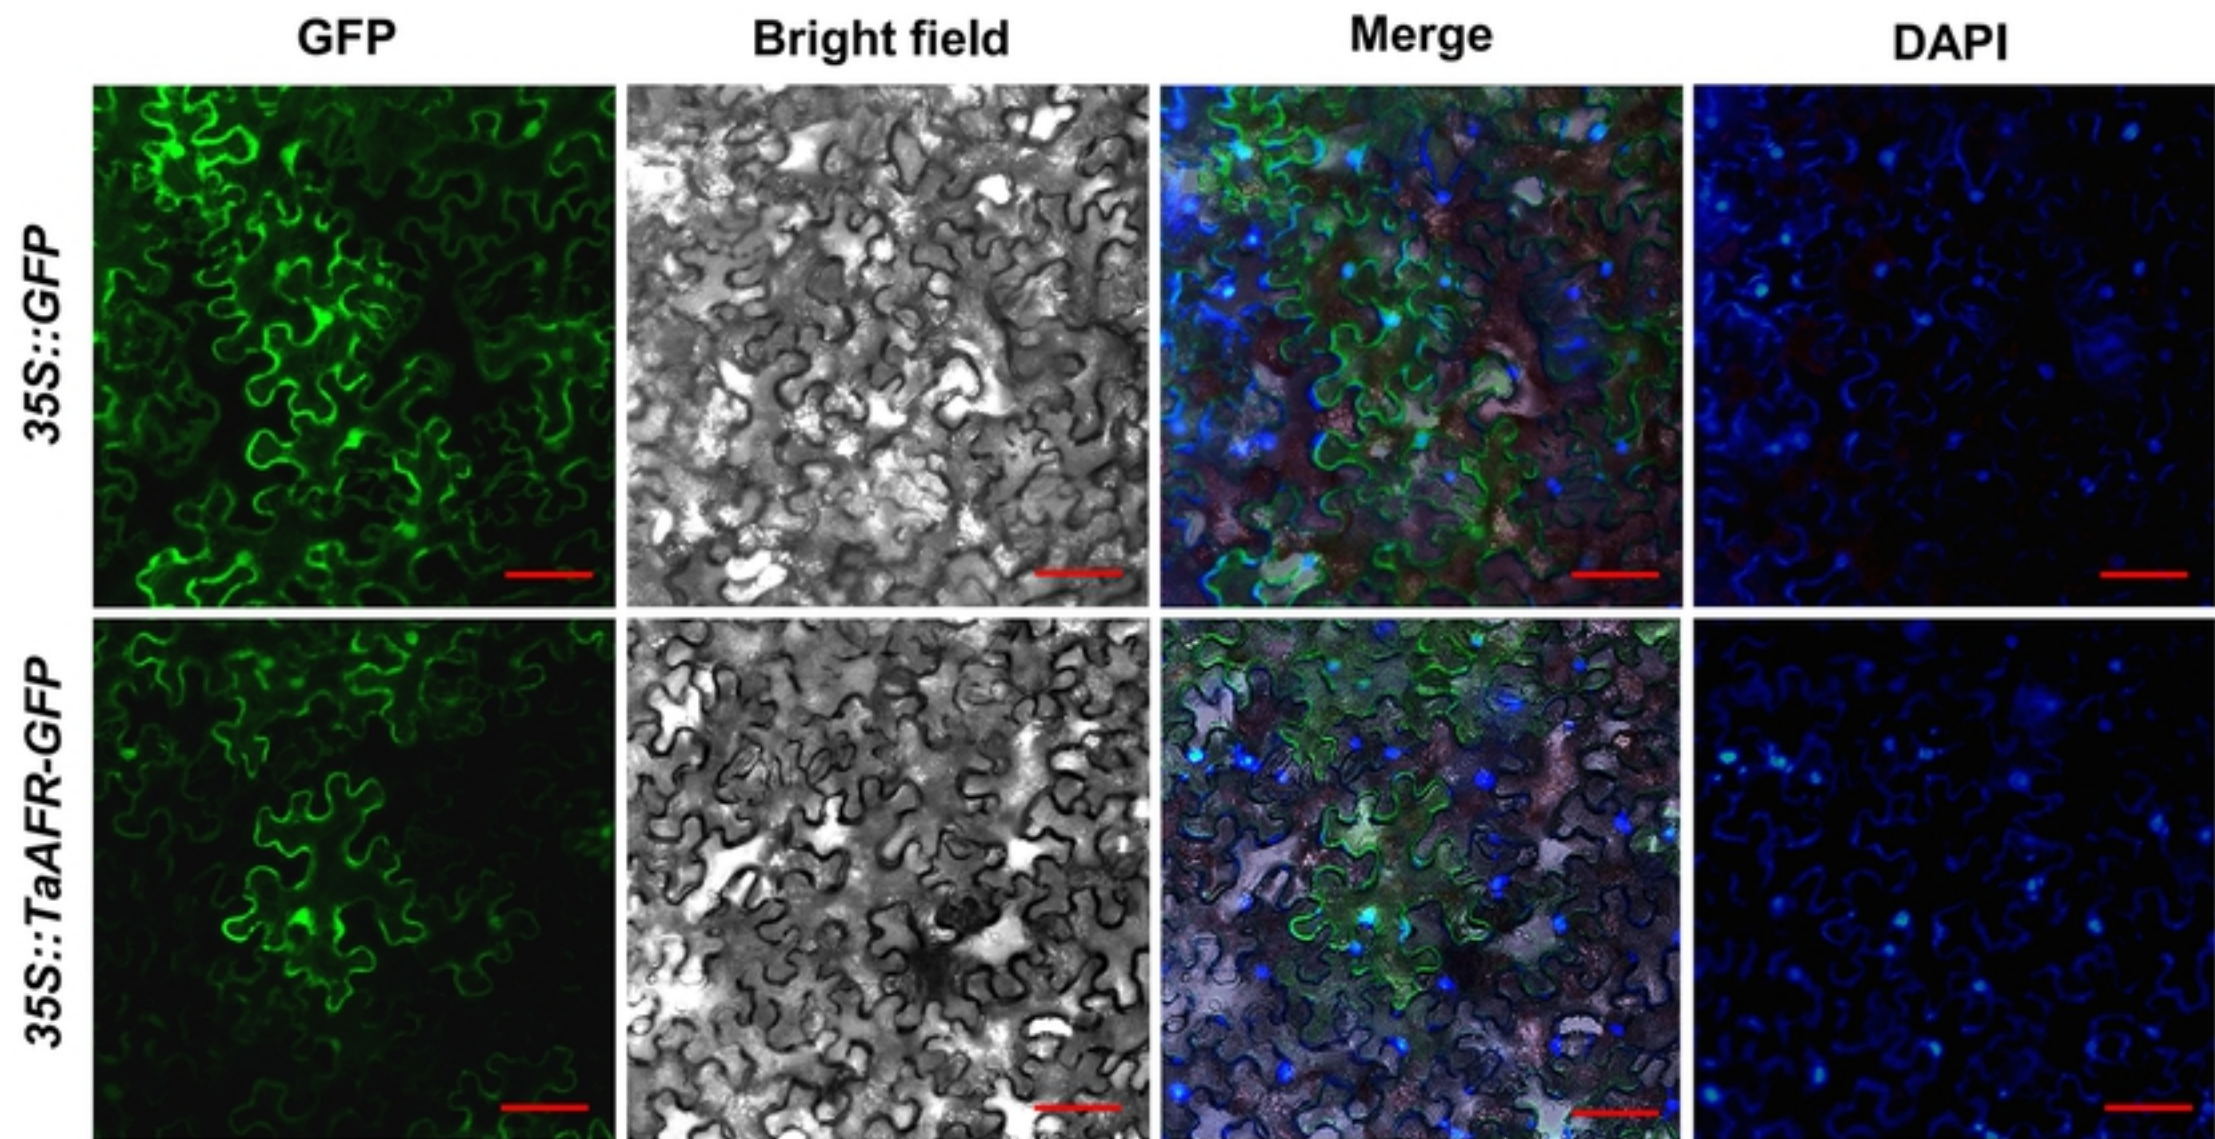

Fig 6. Fluorescence observation for subcellular localization of TaA

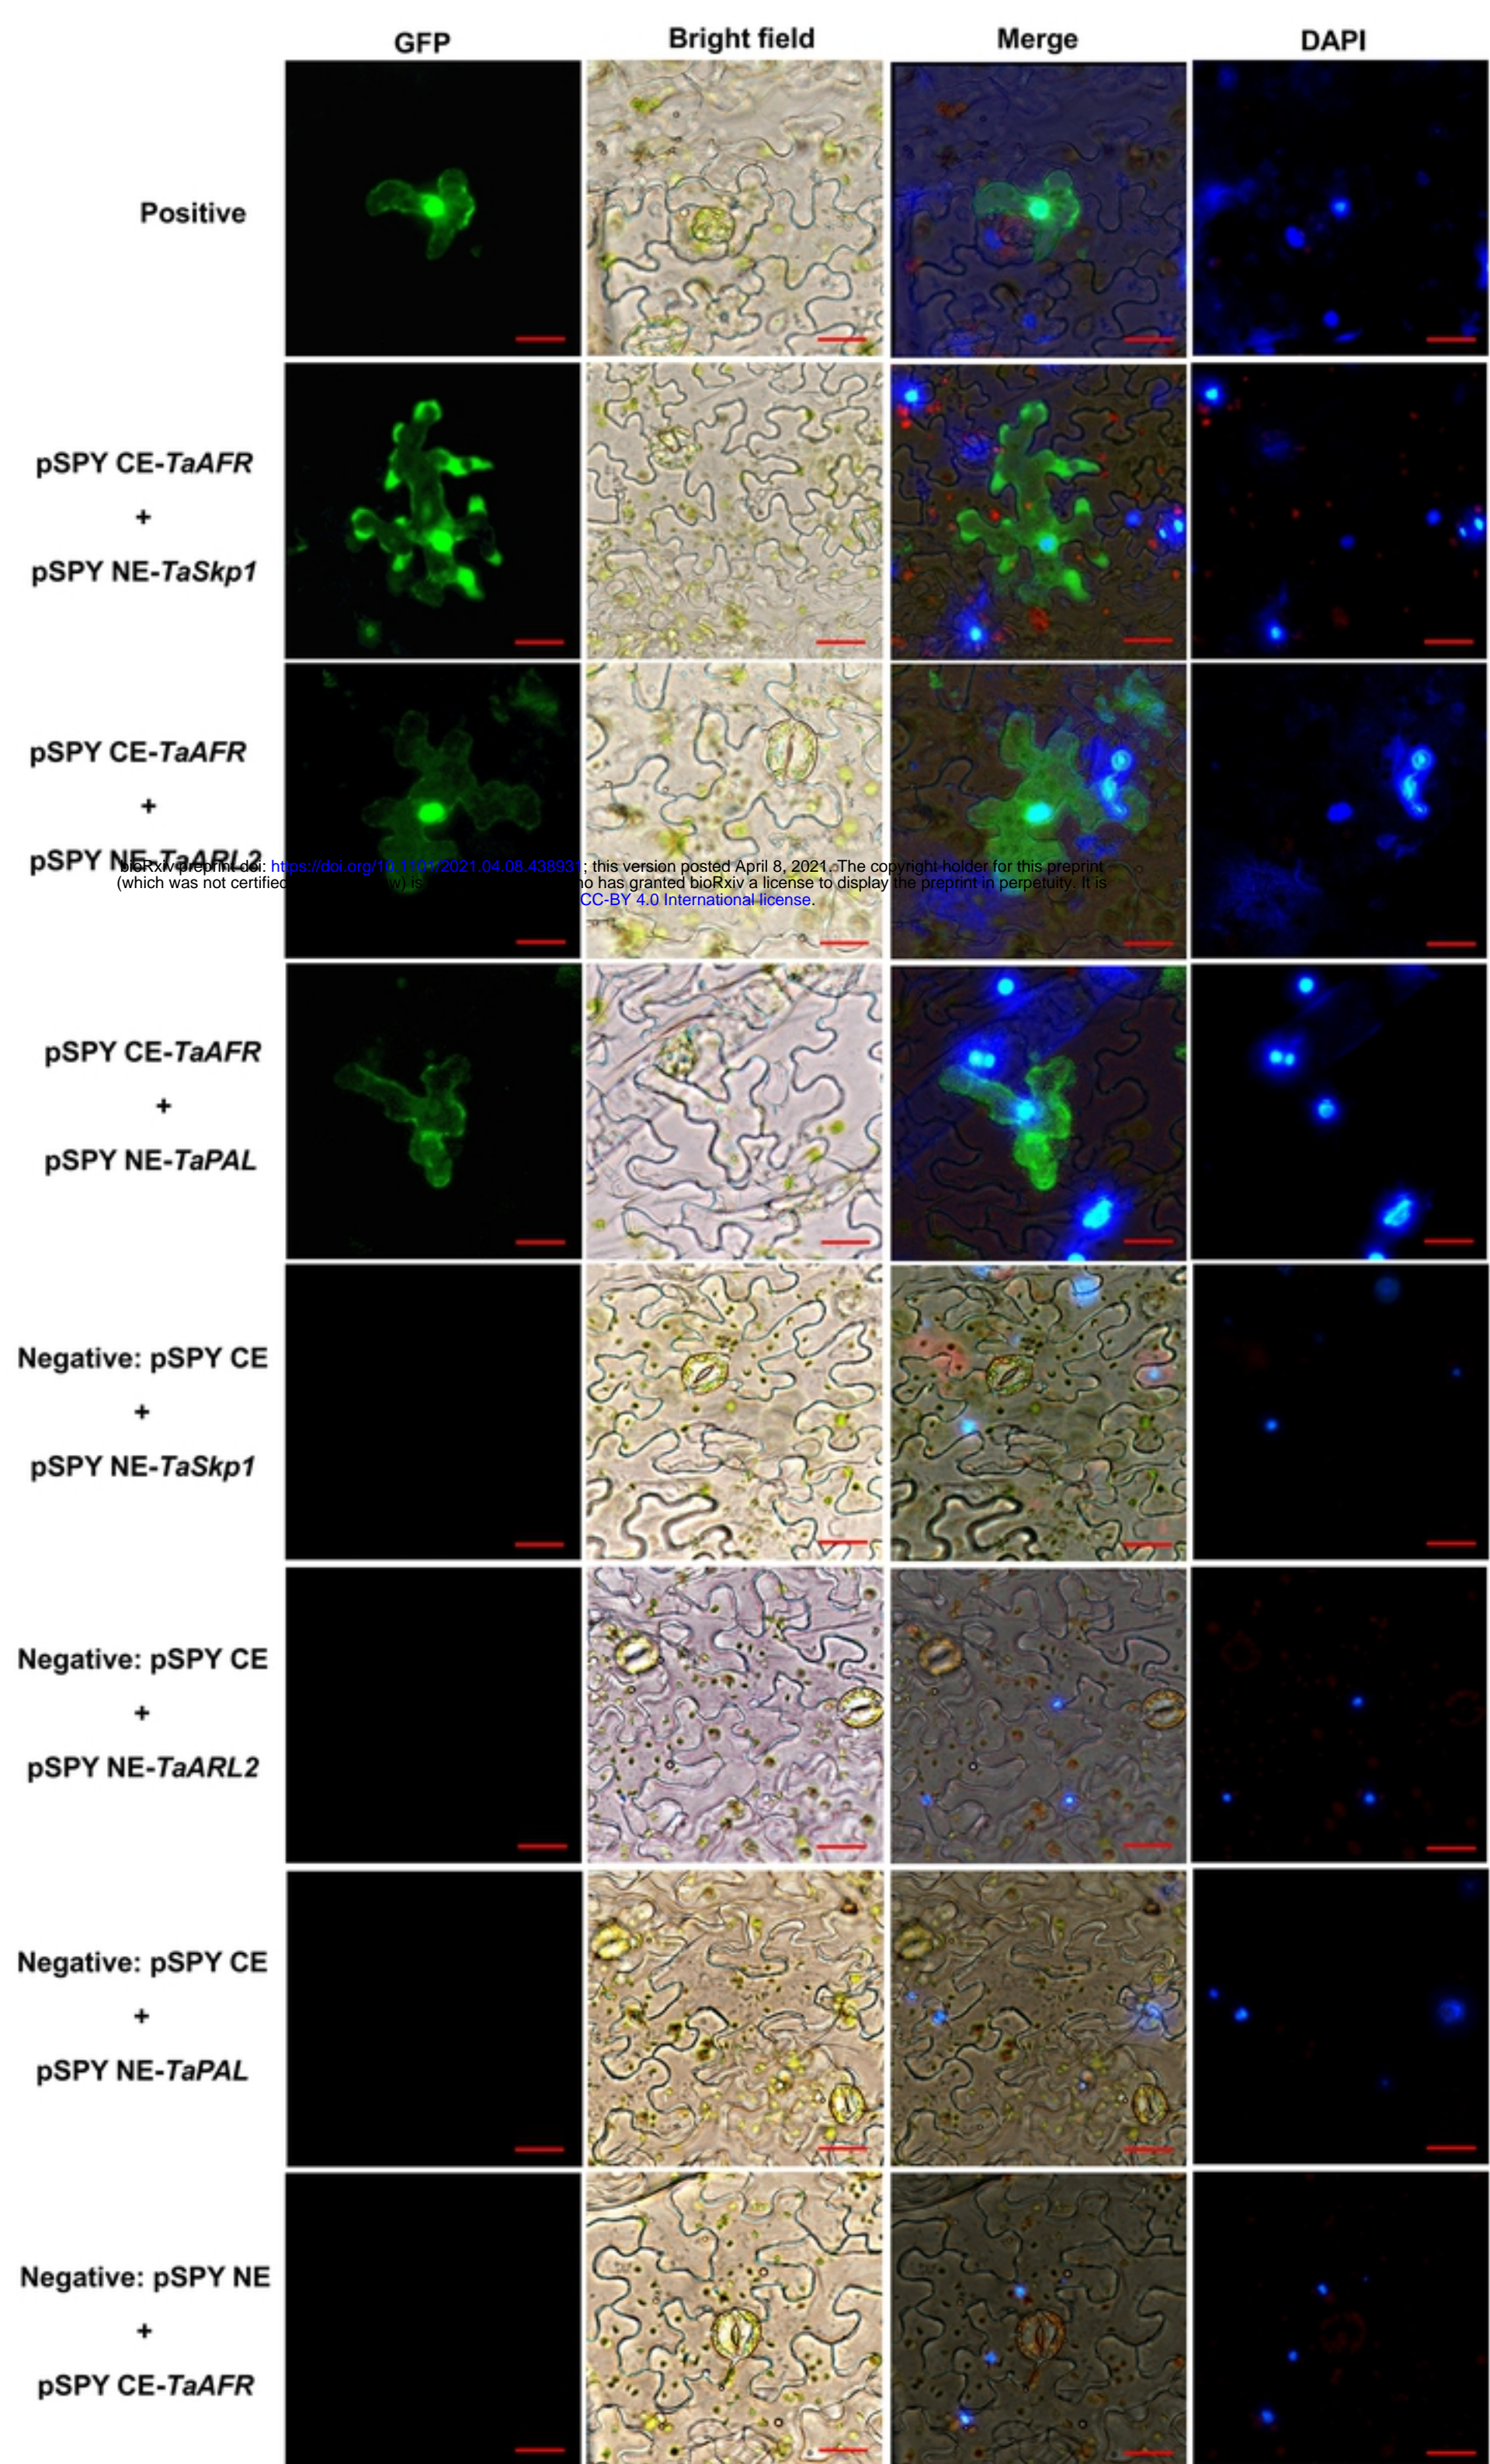

Fig 8. Verification of protein interactions by BiFC.
